# Supplementary material for: In Vivo and In Vitro Antidiabetic and Anti-Inflammatory Properties of Flax (Linum usitatissimum L.) Seed Polyphenols
Source: MDPI journal article supplement (doi:10.3390/nu13082759), 2021-08-11

# = Shimadzu LabSolutions Quant. Browser Data Report =

Acquired by : System Administrator  
 Data Acquired : 26/05/2021 11:23:38  
 Sample Type : Unknown  
 Sample Name : blnk hydrophylic  
 Sample ID :  
 Sample Amount : 1  
 Dilution Factor : 1  
 Vial# : 84  
 Injection Volume : 0.5 uL  
 Data Filename : blnk hydrophylic\_007.lcd  
 Method Filename : polifenoli screening SIM.lcm  
 Processed by : System Administrator  
 Modified Date : 26/05/2021 12:36:49

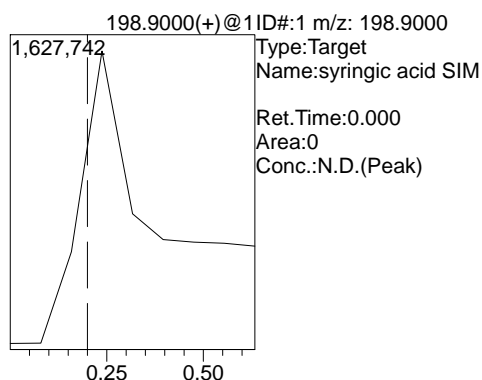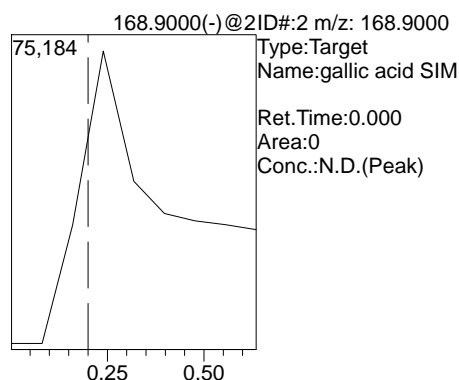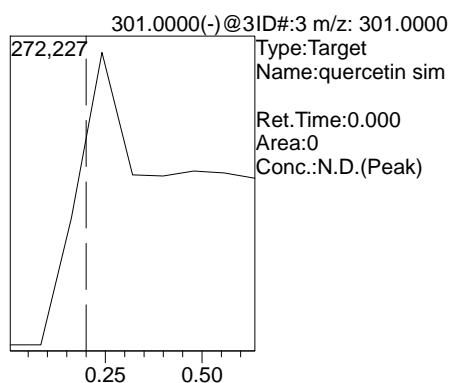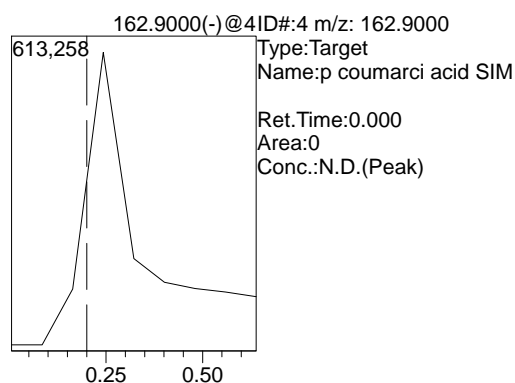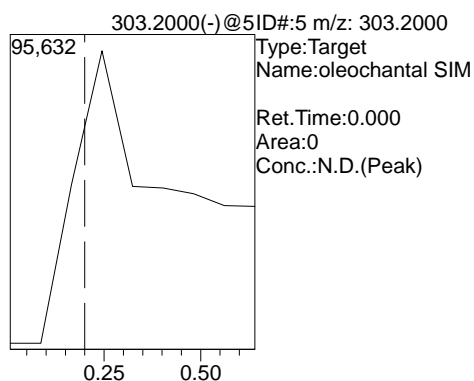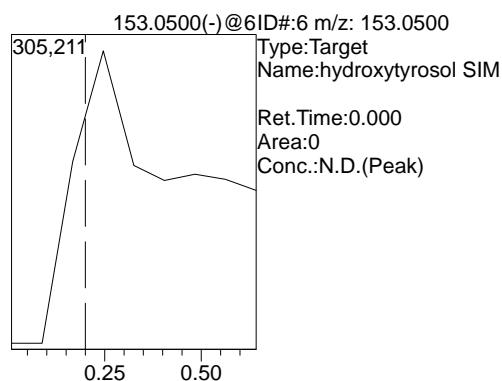

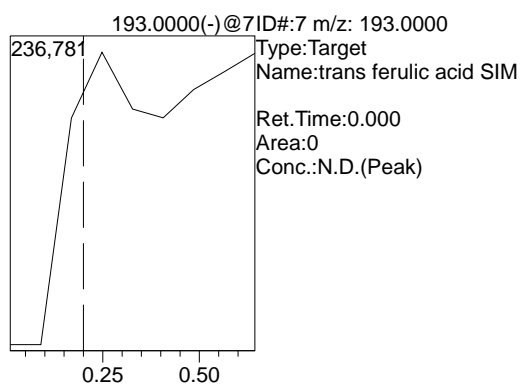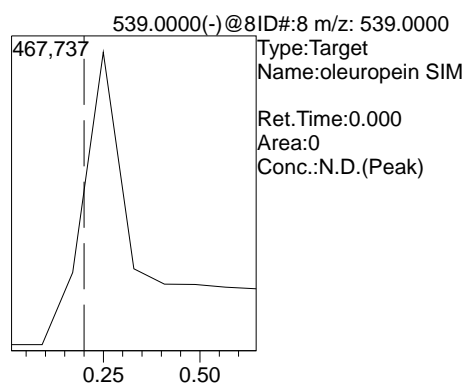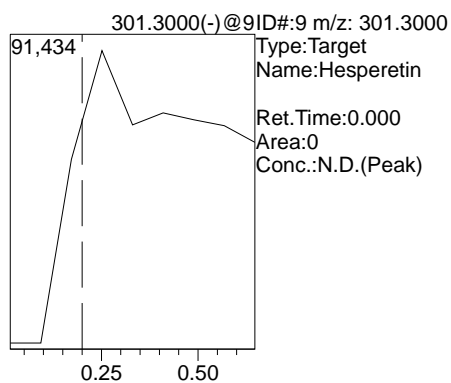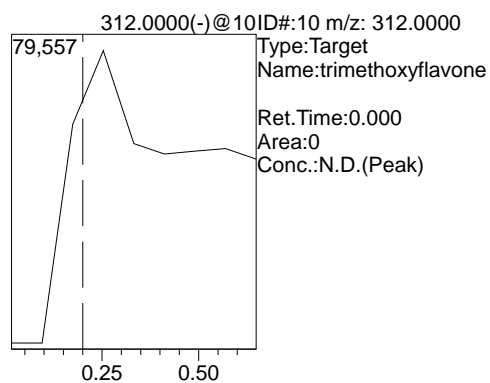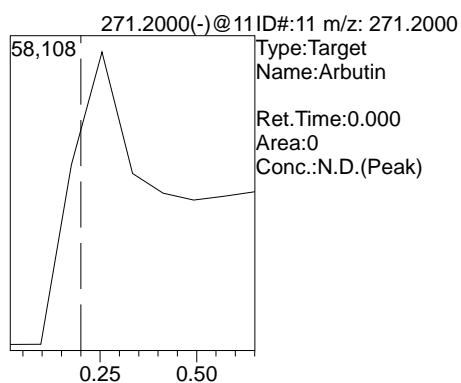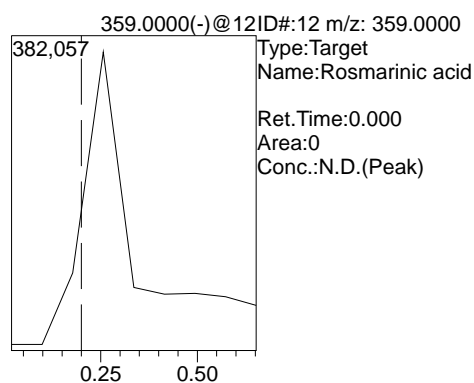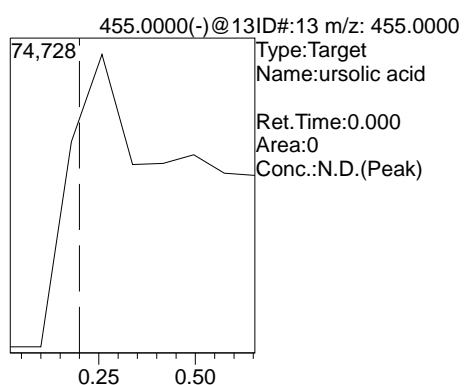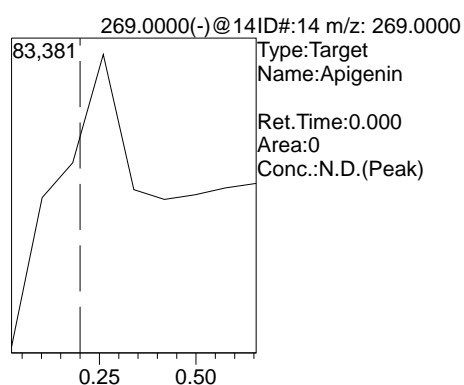

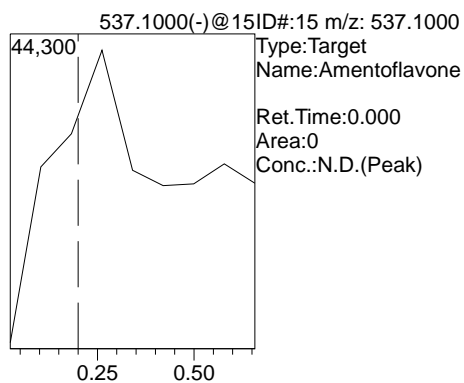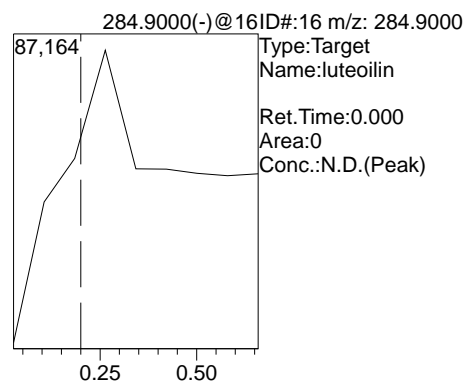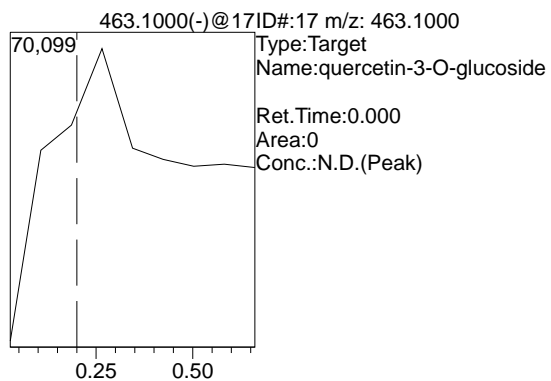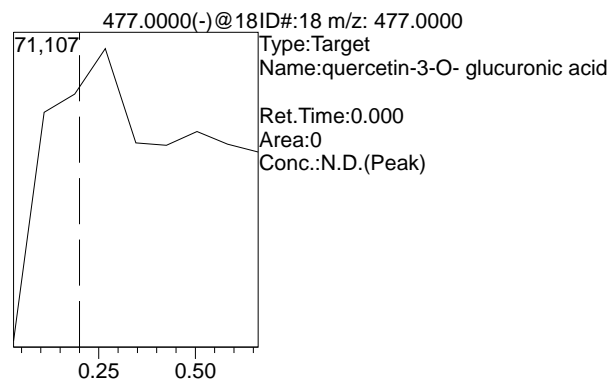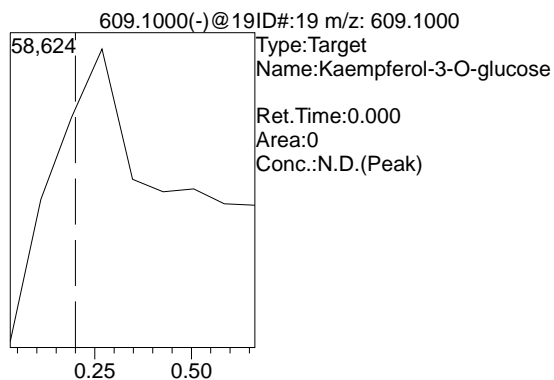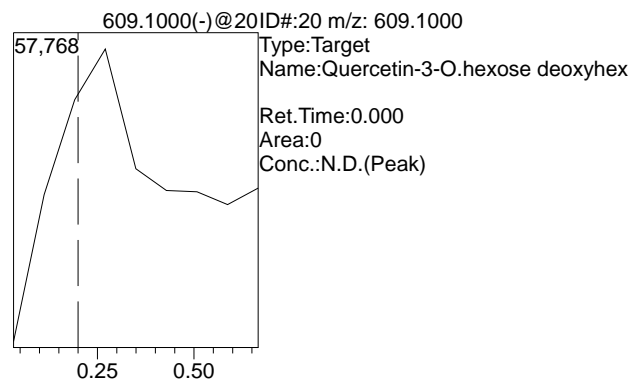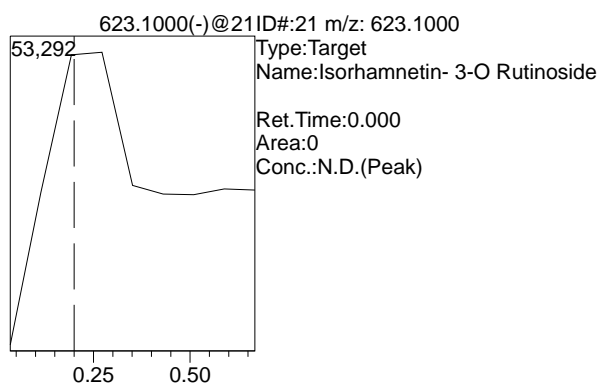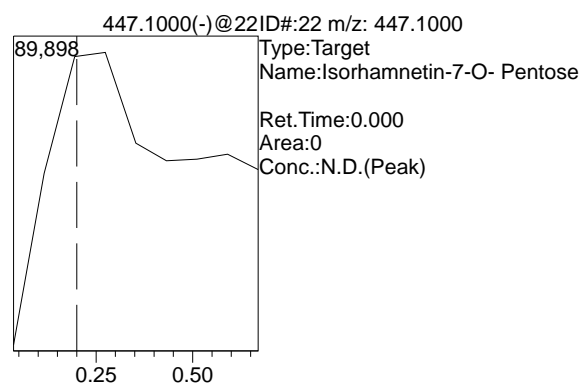

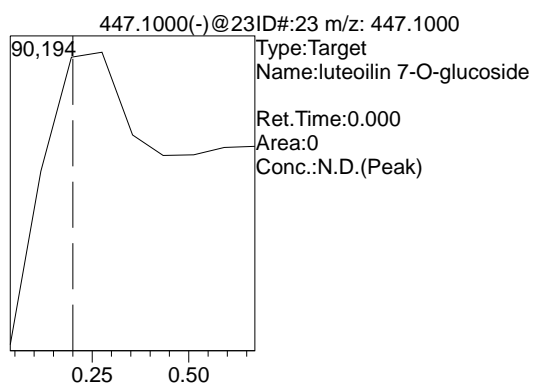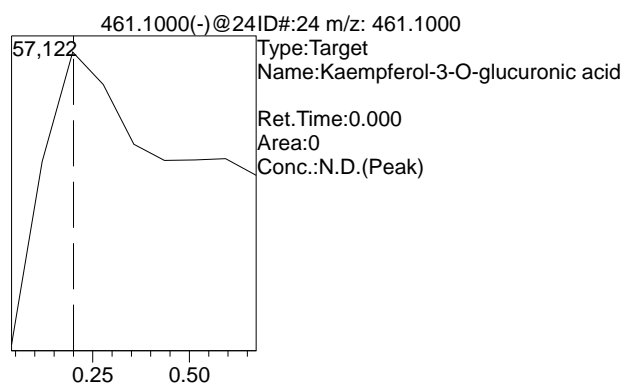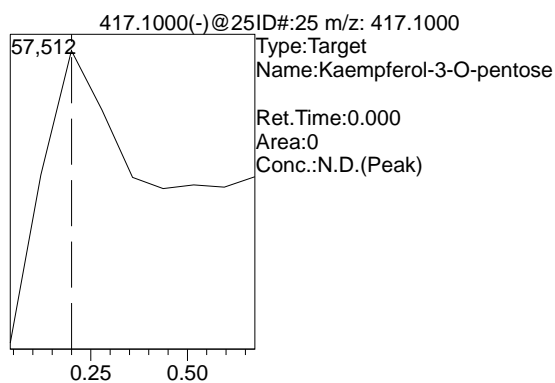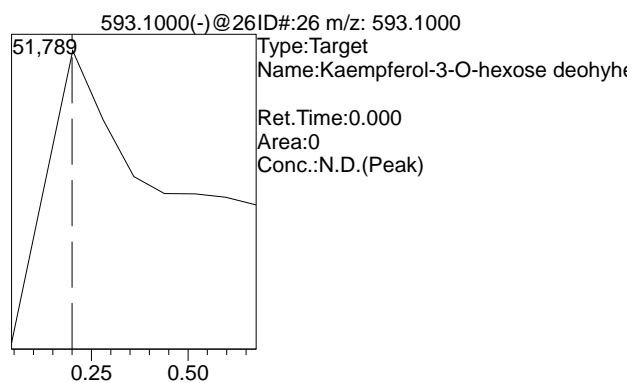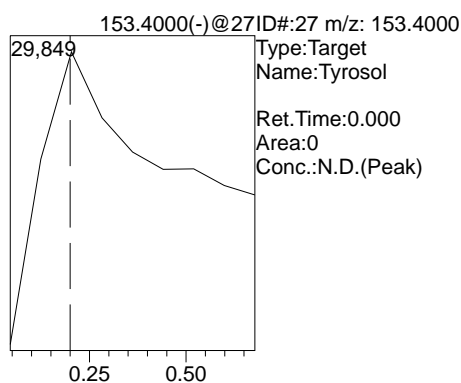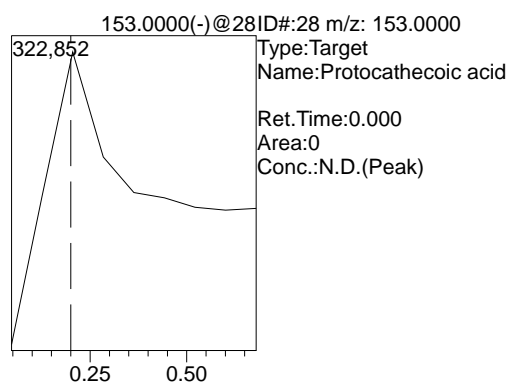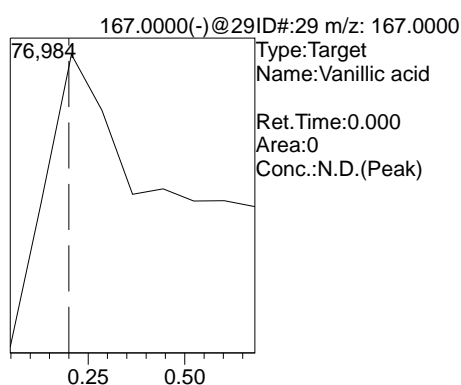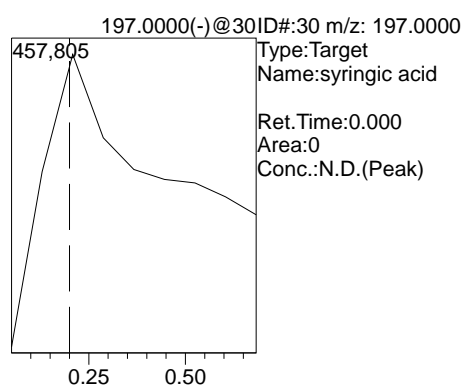

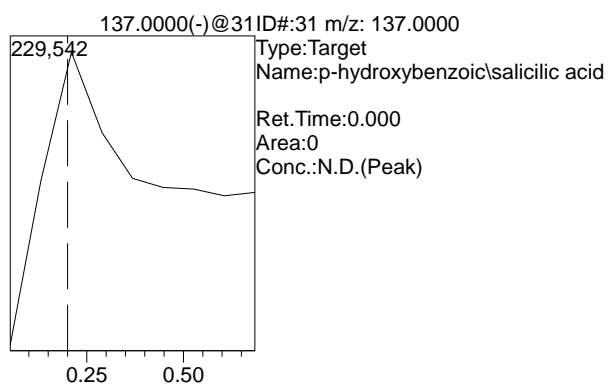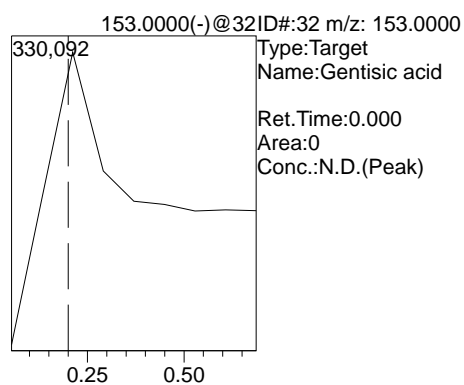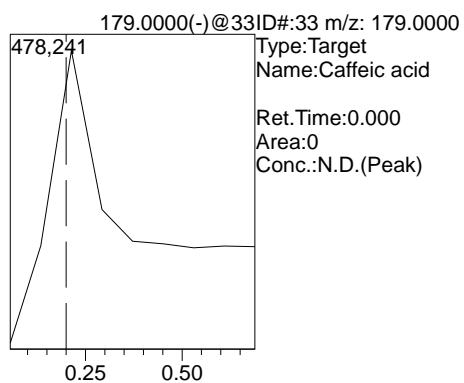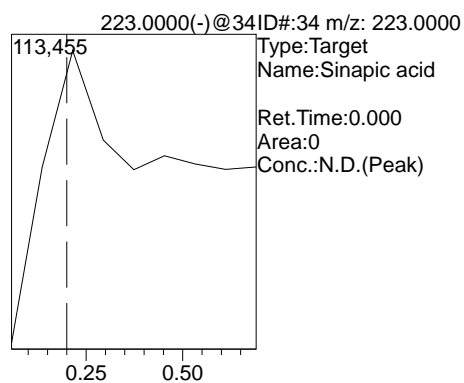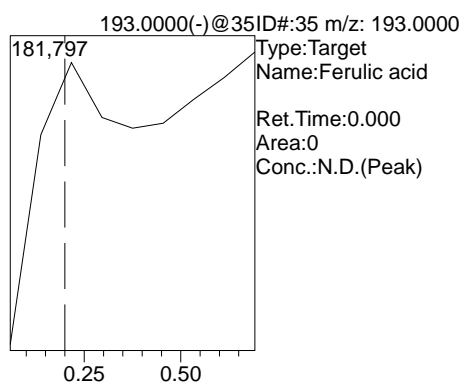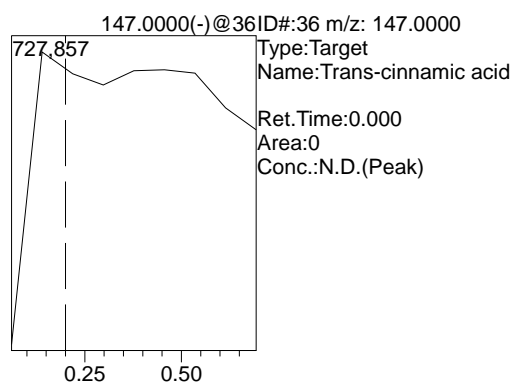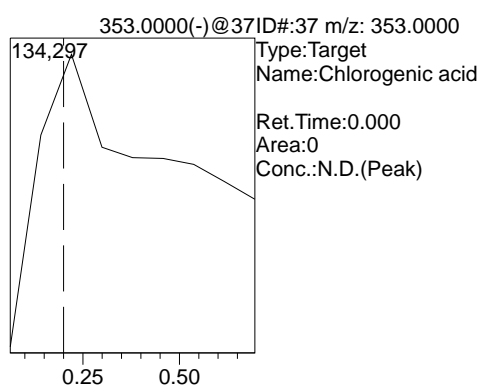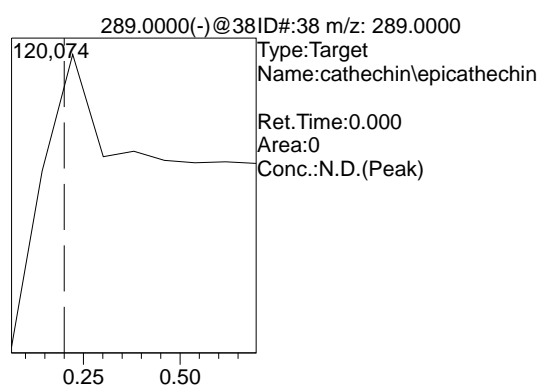

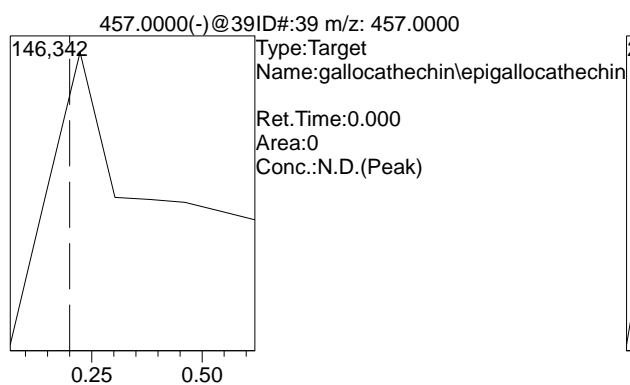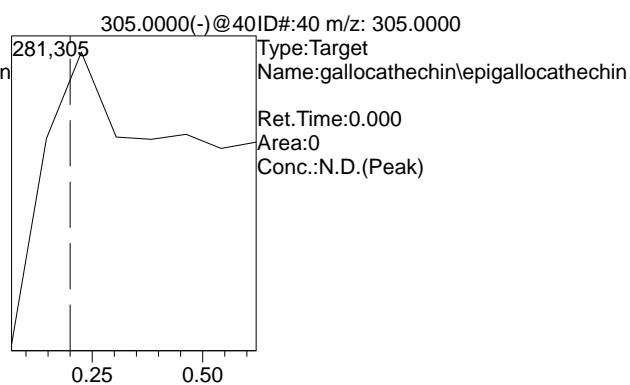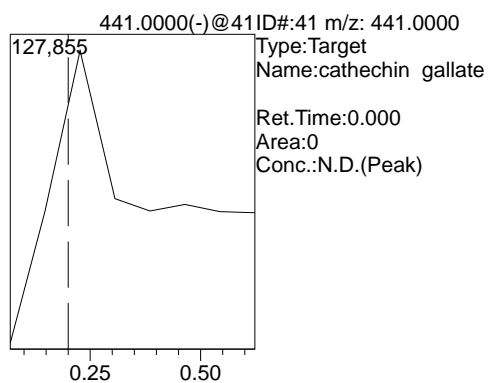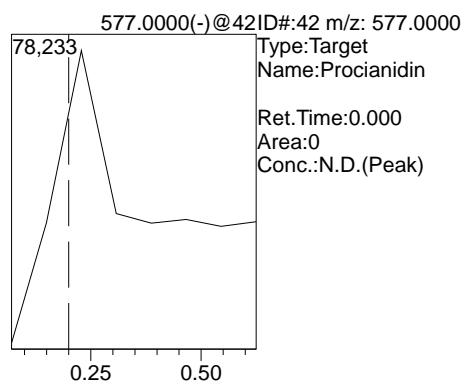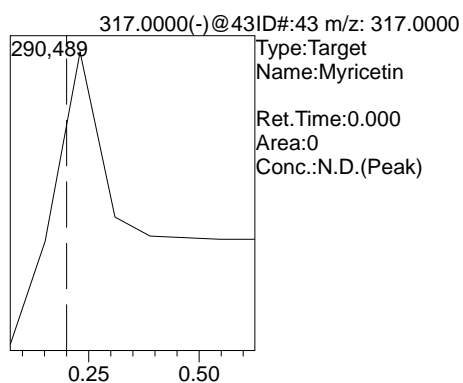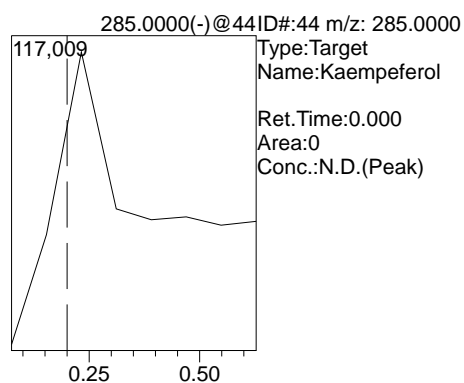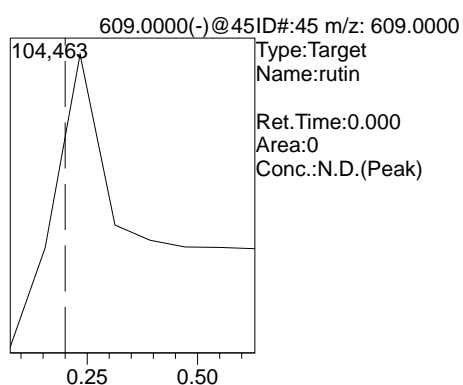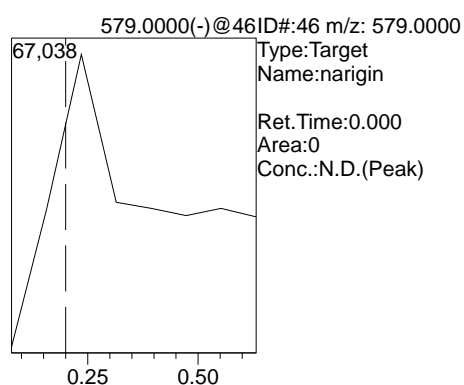

# = Shimadzu LabSolutions Quant. Browser Data Report =

Acquired by : System Administrator  
 Data Acquired : 26/05/2021 11:19:15  
 Sample Type : Unknown  
 Sample Name : blnk lipophylic  
 Sample ID :  
 Sample Amount : 1  
 Dilution Factor : 1  
 Vial# : 81  
 Injection Volume : 0.5 uL  
 Data Filename : blnk lipophylic\_004.lcd  
 Method Filename : polifenoli screening SIM.lcm  
 Processed by : System Administrator  
 Modified Date : 26/05/2021 12:36:49

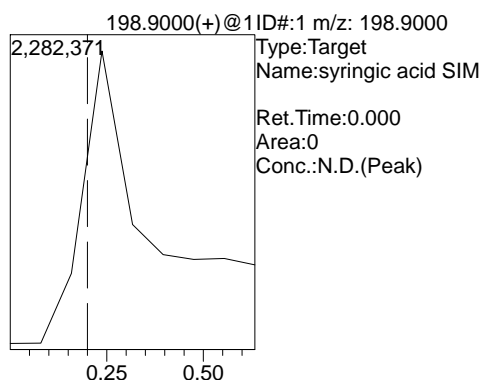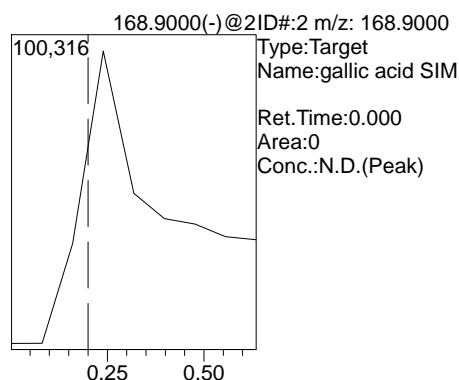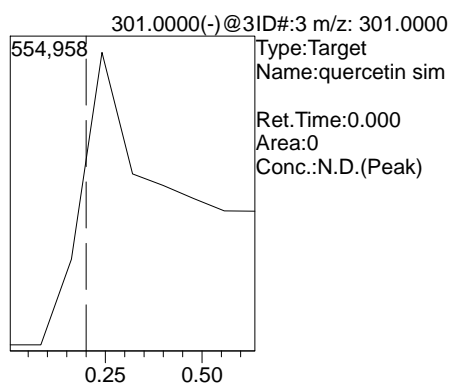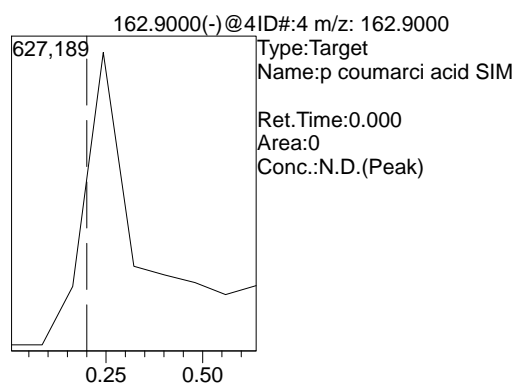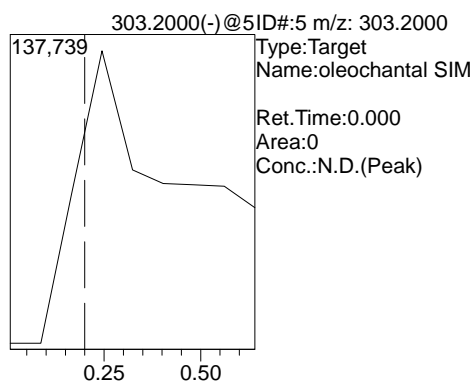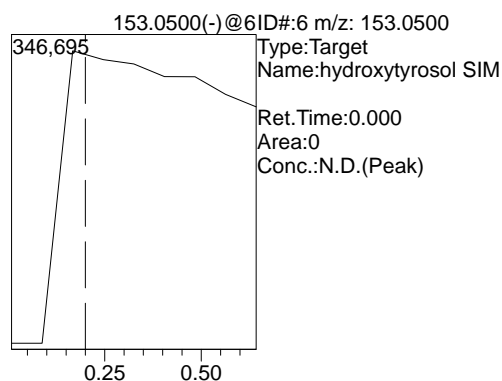

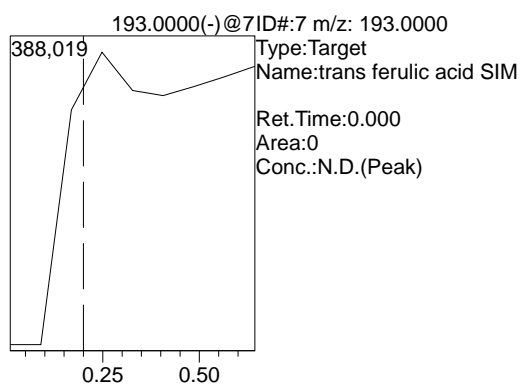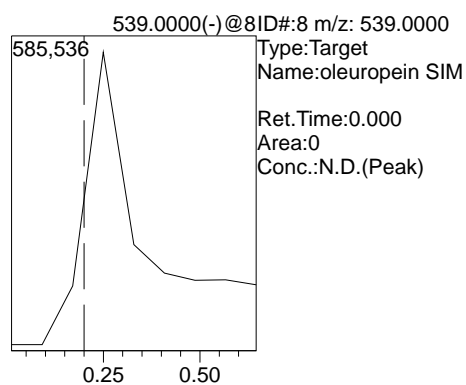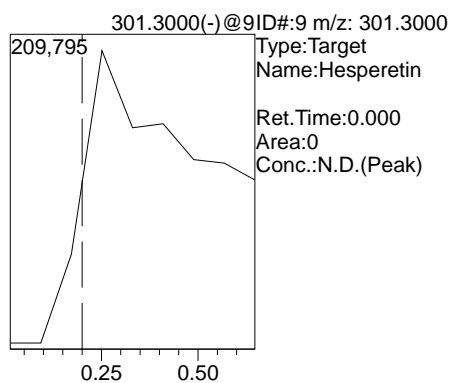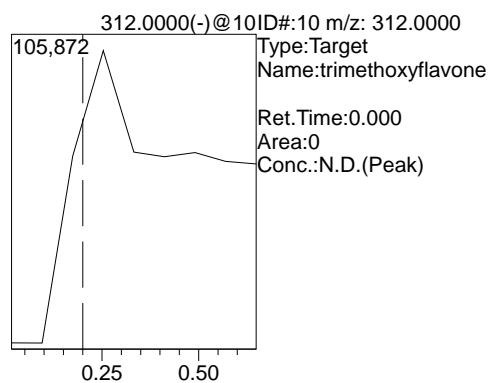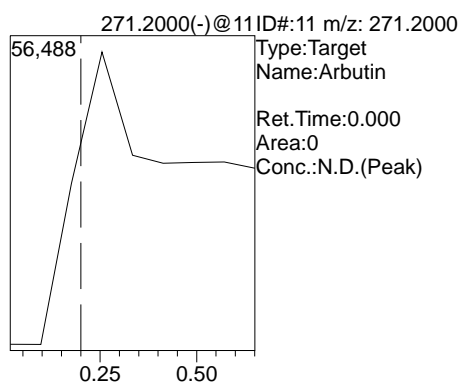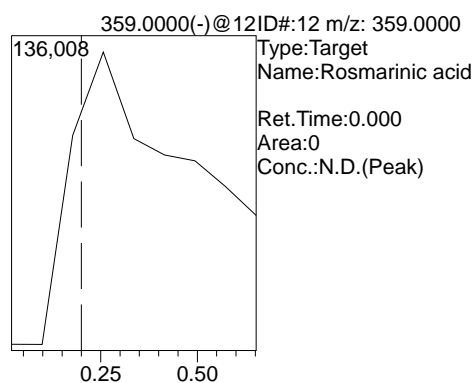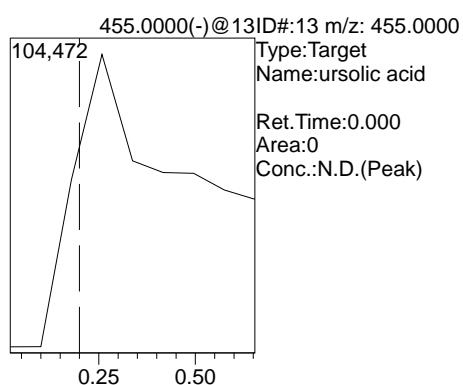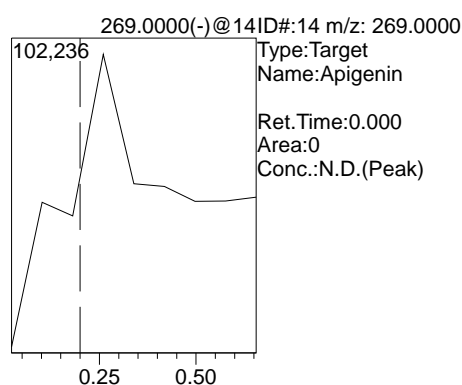



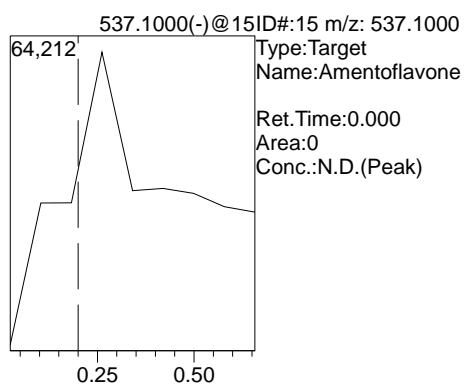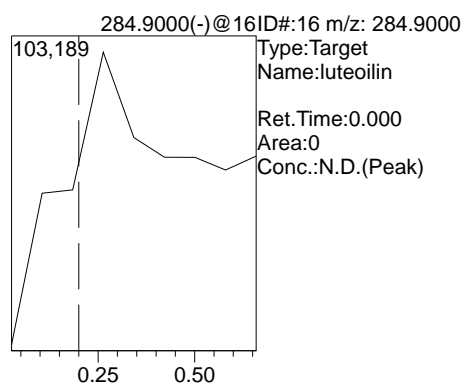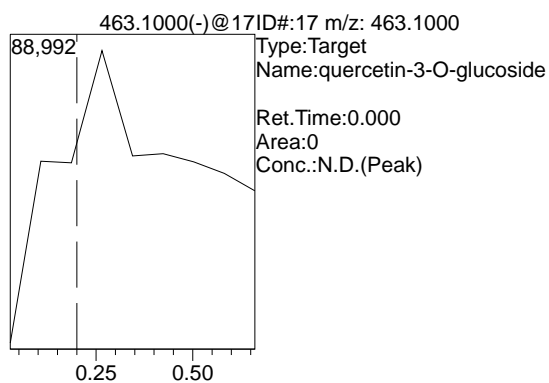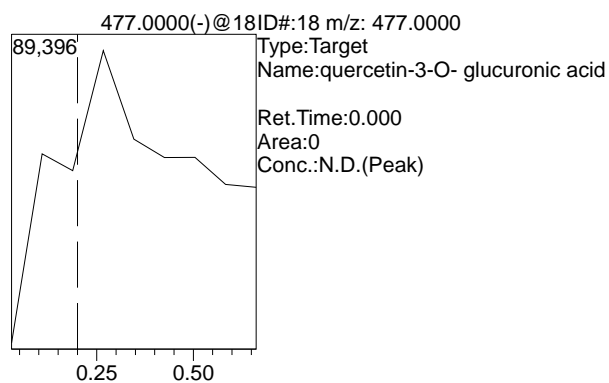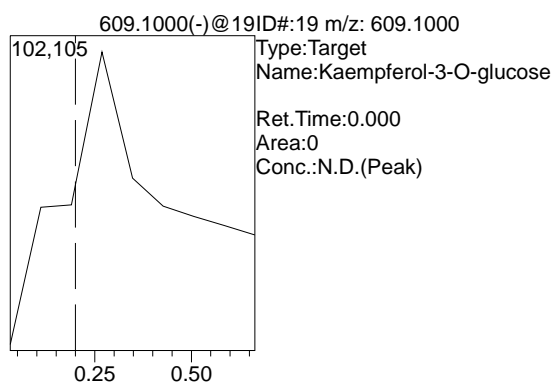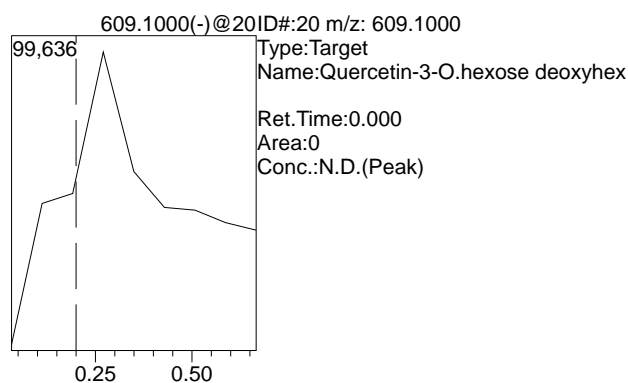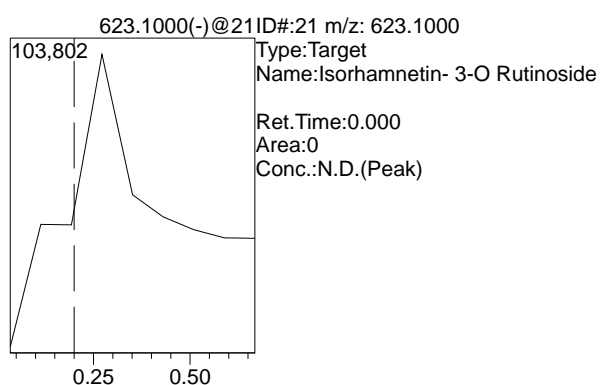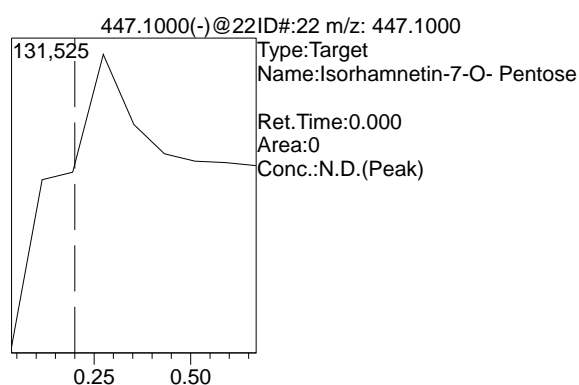

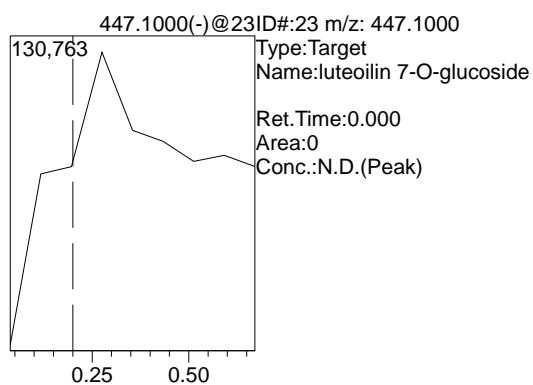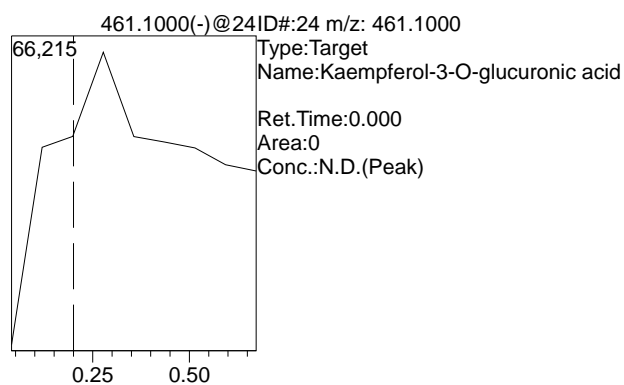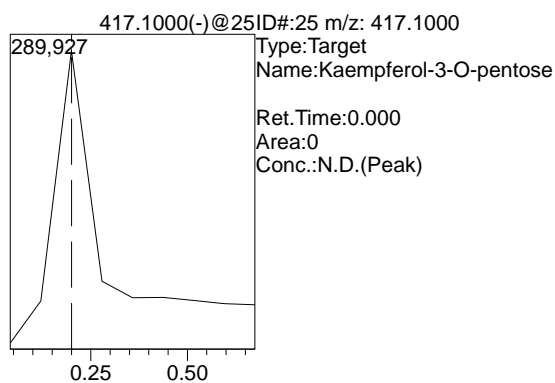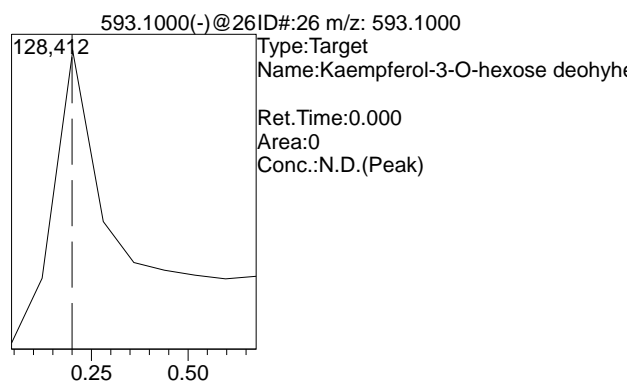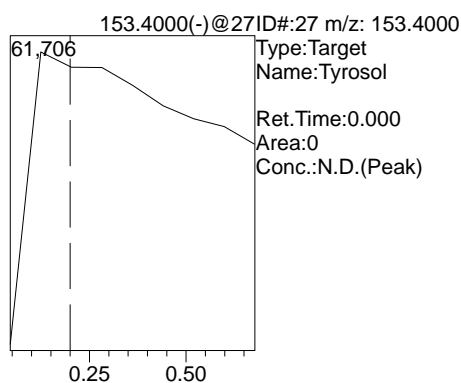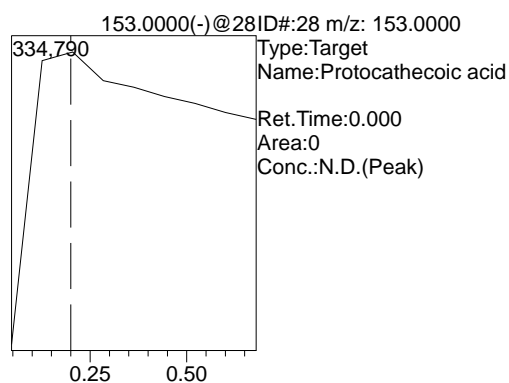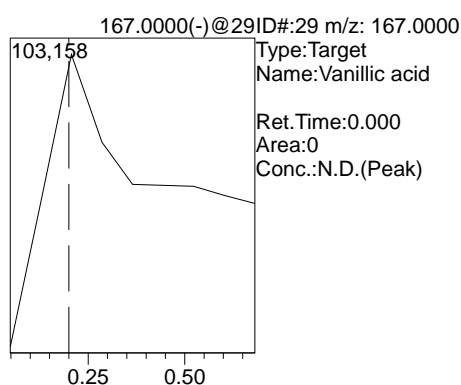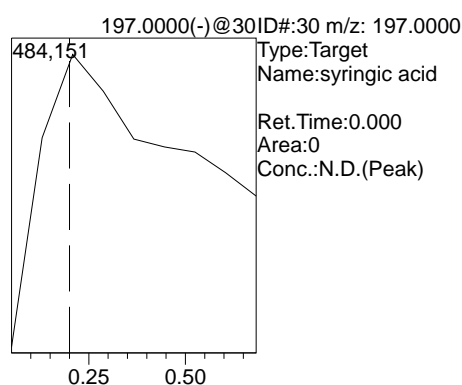

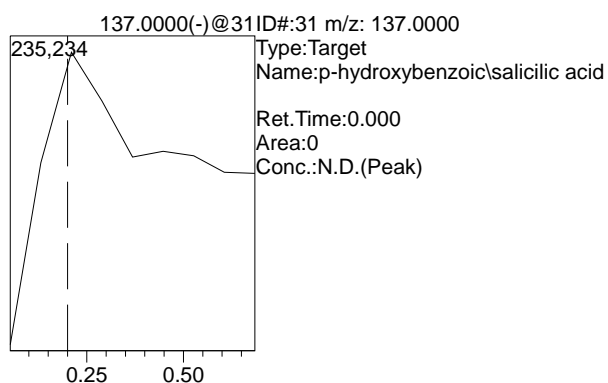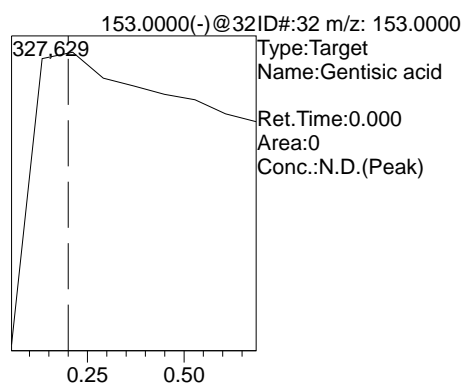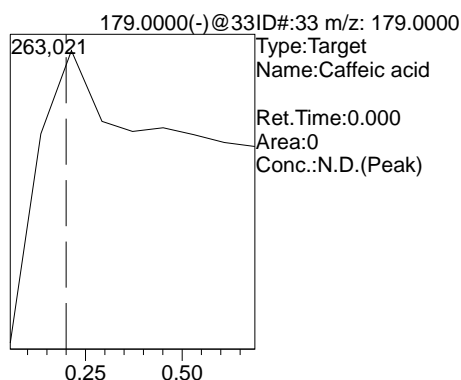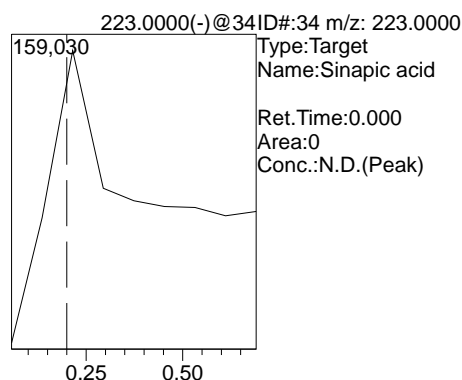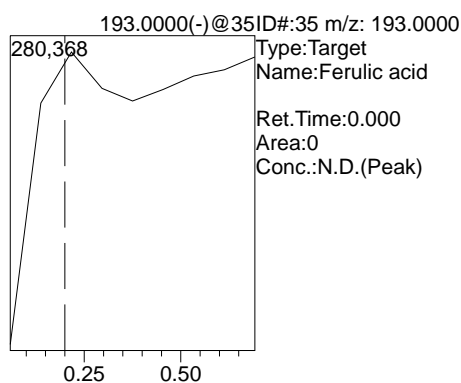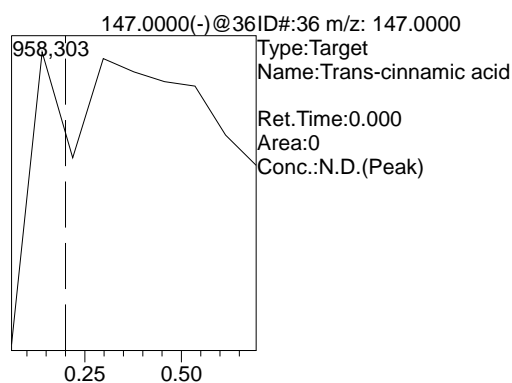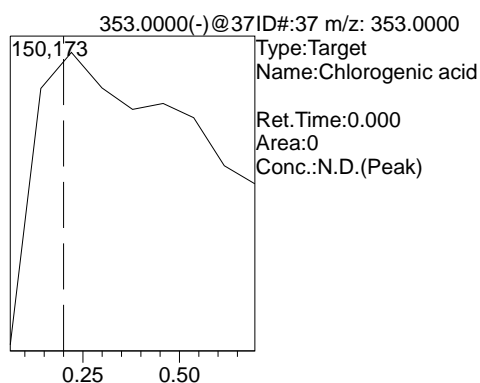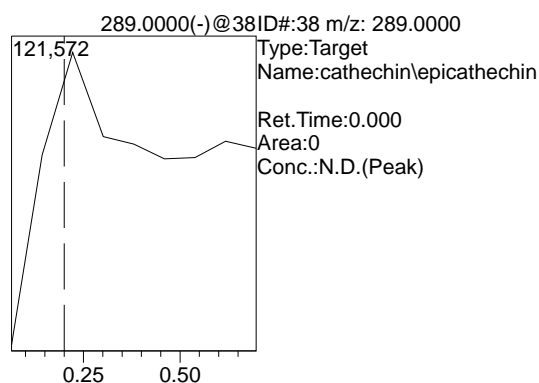

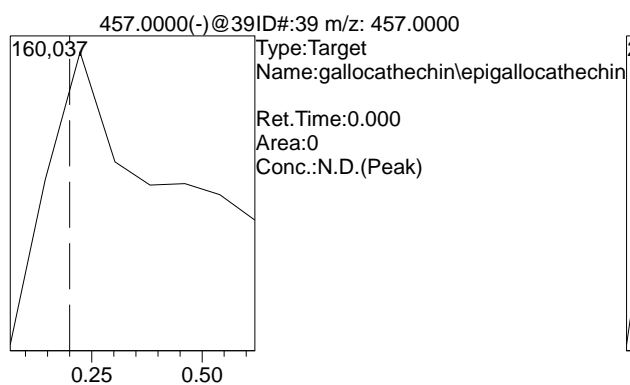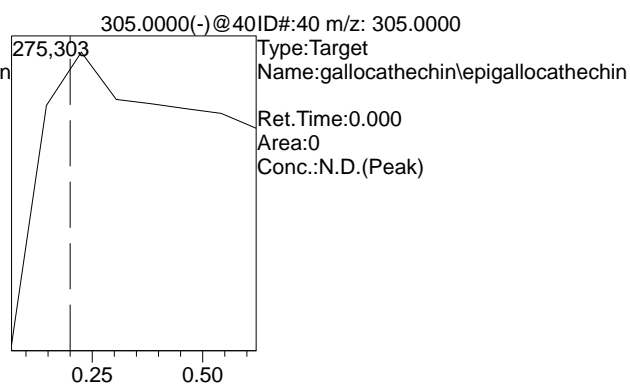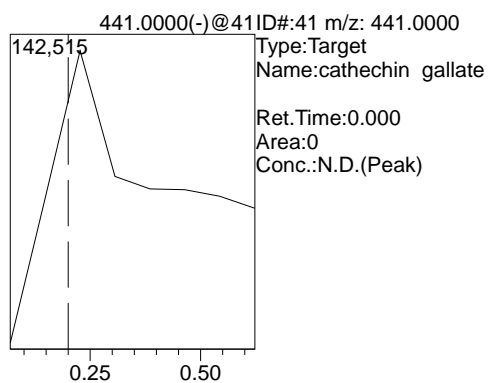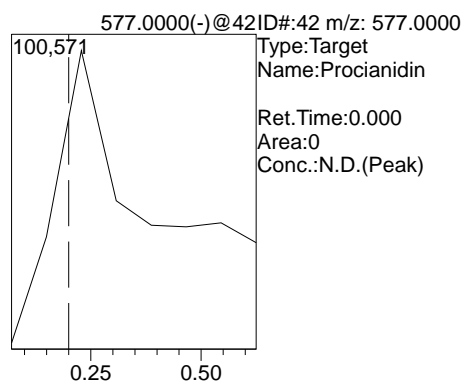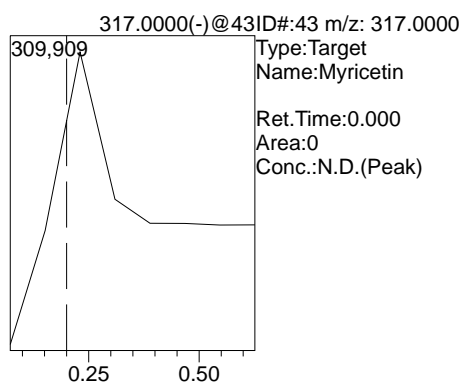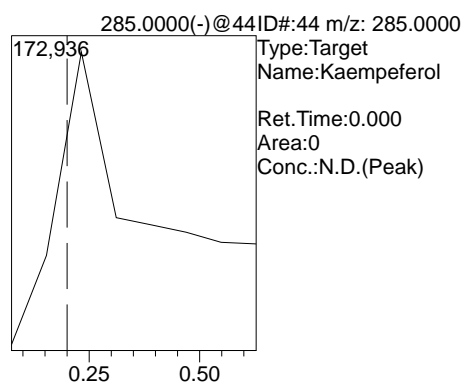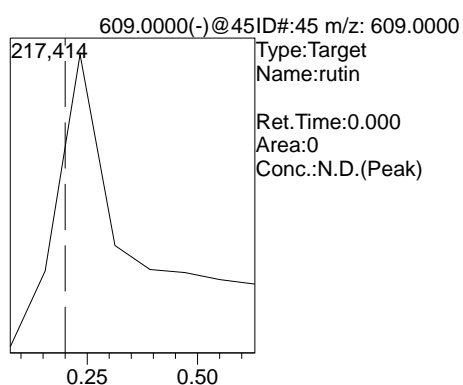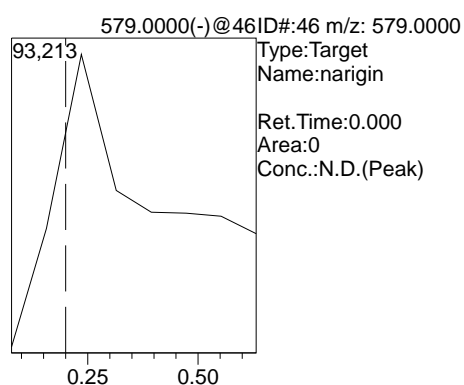

# = Shimadzu LabSolutions Quant. Browser Data Report =

Acquired by : System Administrator  
 Data Acquired : 26/05/2021 11:27:57  
 Sample Type : Unknown  
 Sample Name : hydrophylic extract 13  
 Sample ID :  
 Sample Amount : 1  
 Dilution Factor : 1  
 Vial# : 86  
 Injection Volume : 0.5 uL  
 Data Filename : hydrophylic extract 13\_001.lcd  
 Method Filename : polifenoli screening SIM.lcm  
 Processed by : System Administrator  
 Modified Date : 26/05/2021 12:36:50

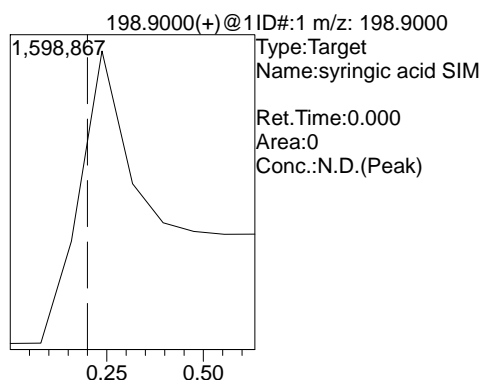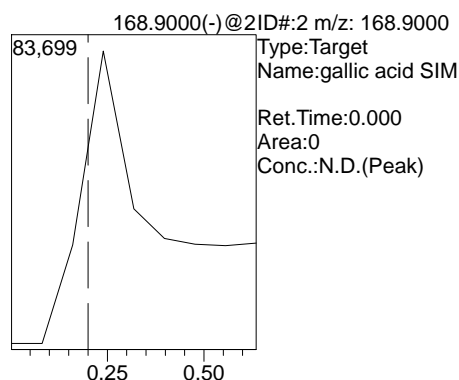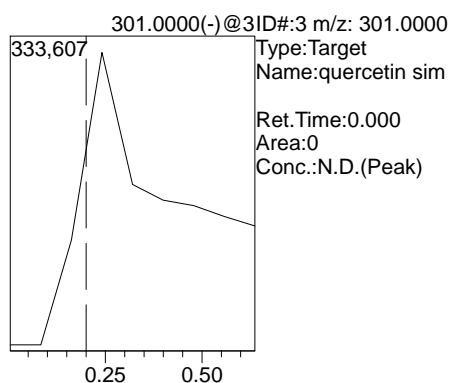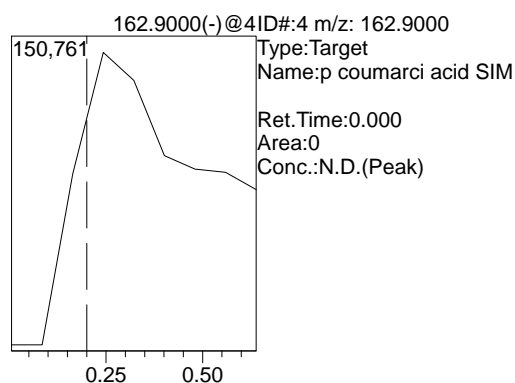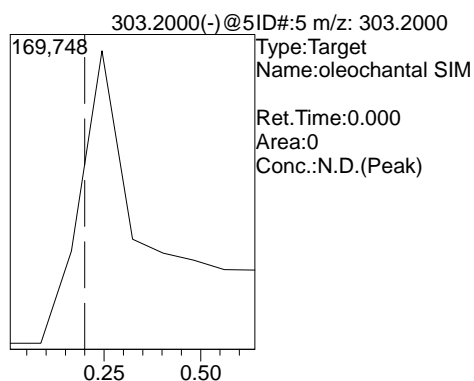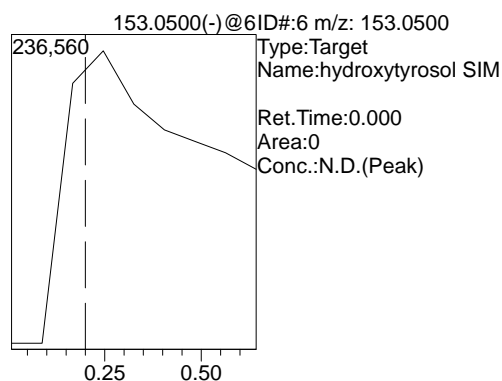

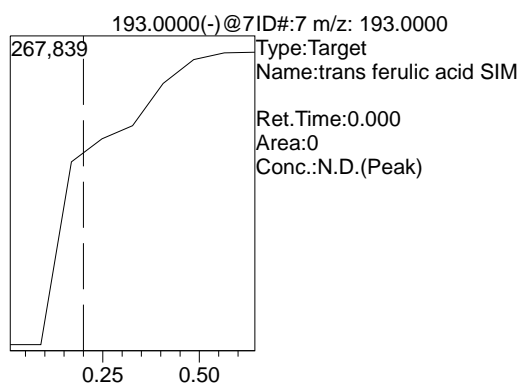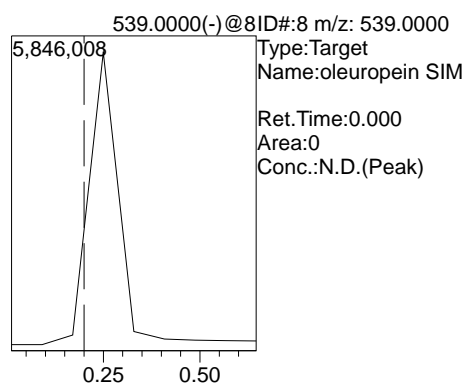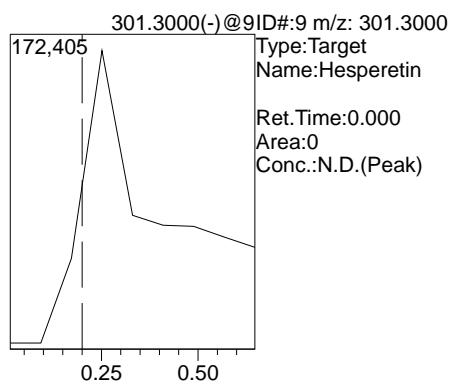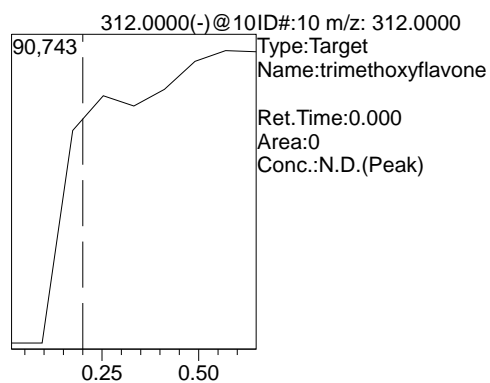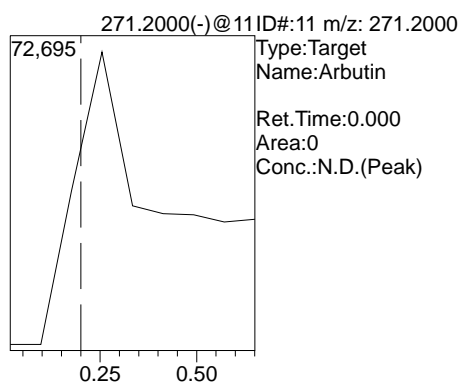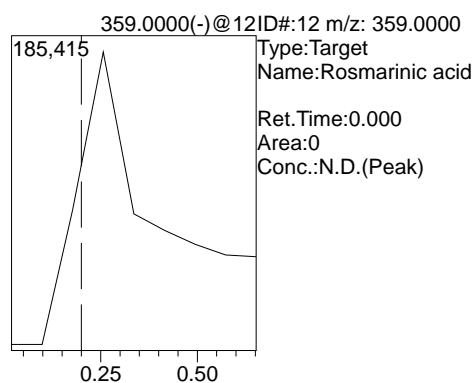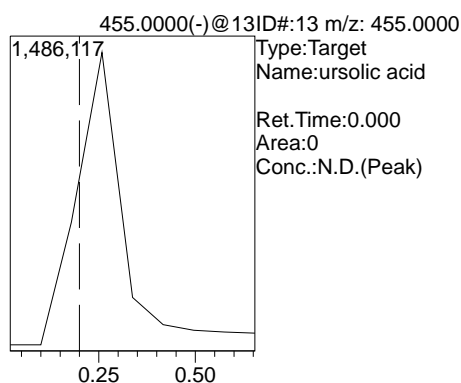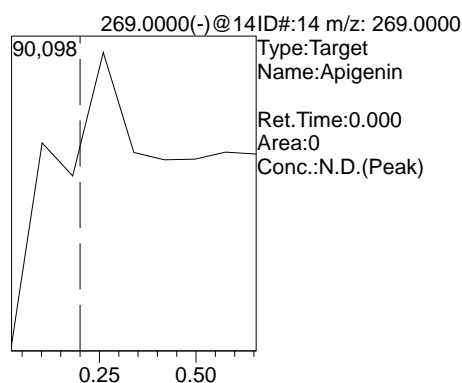

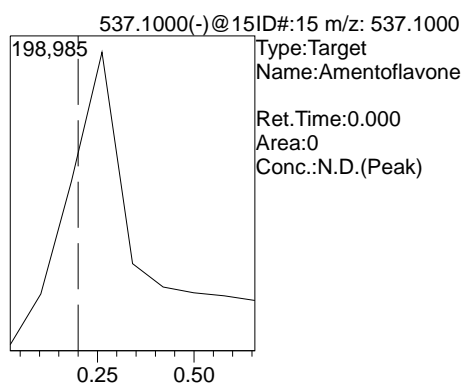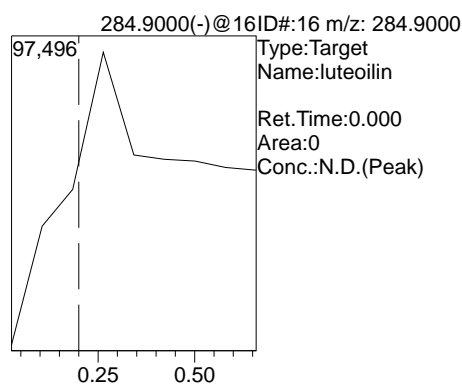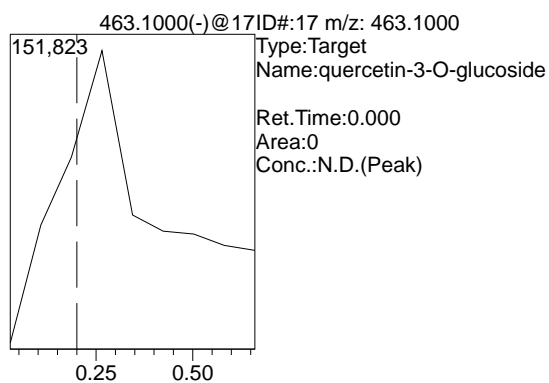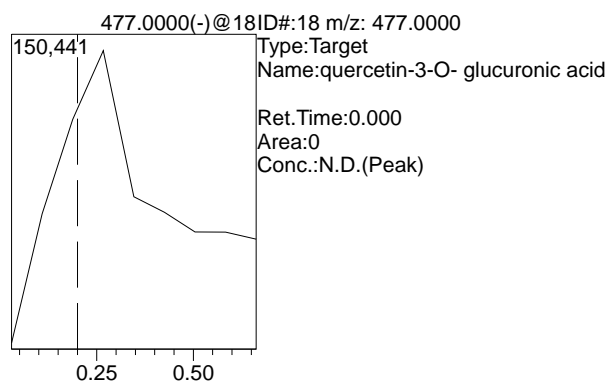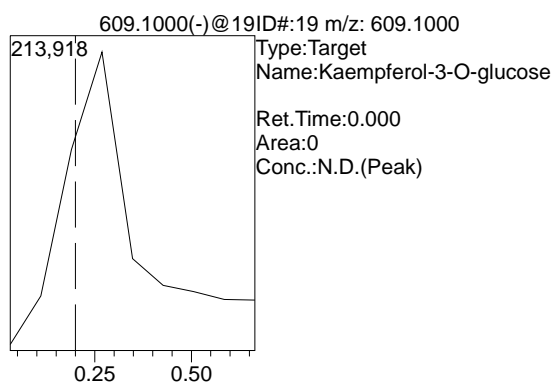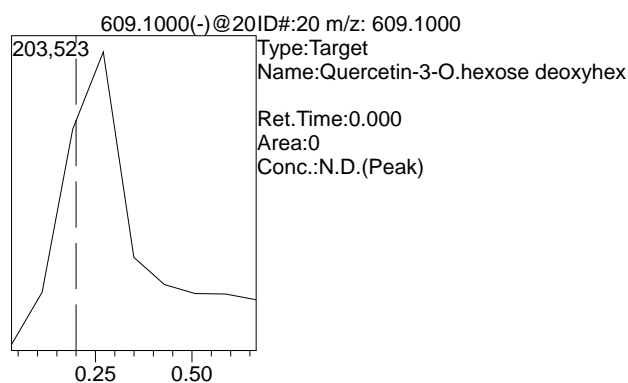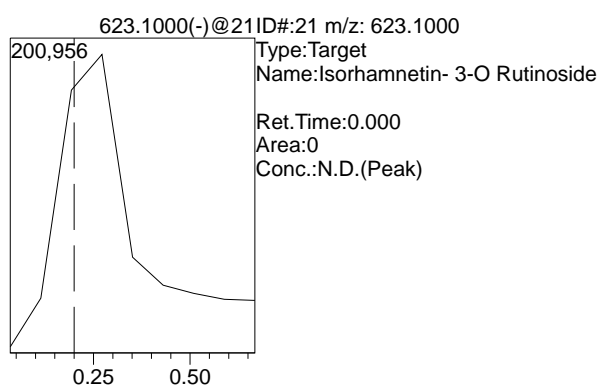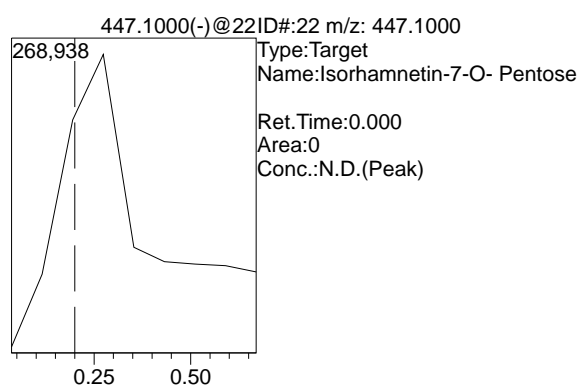

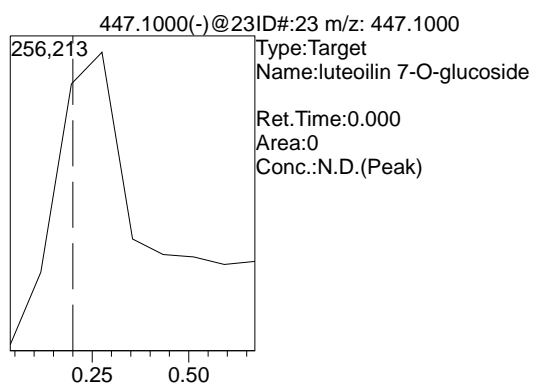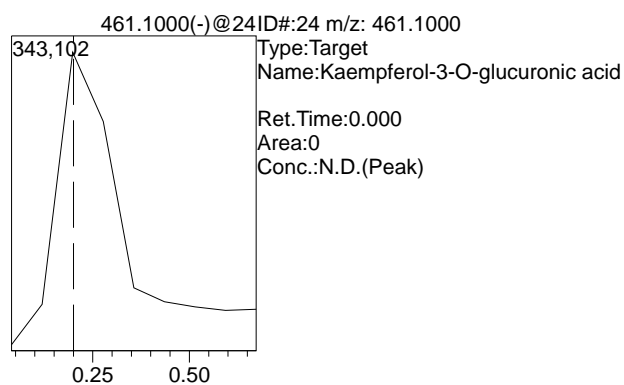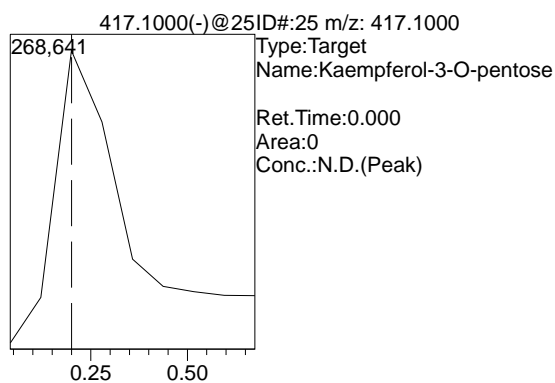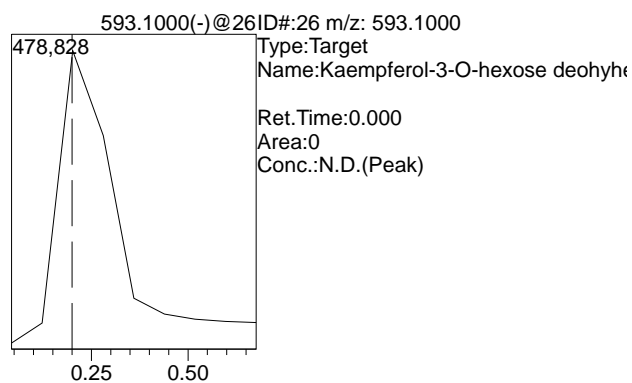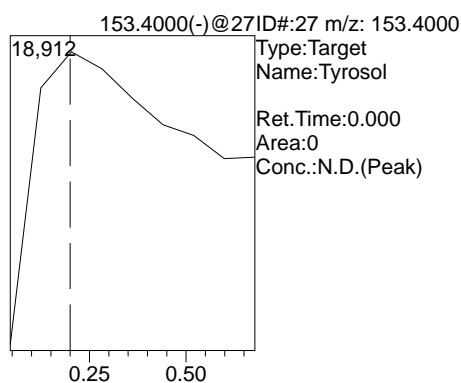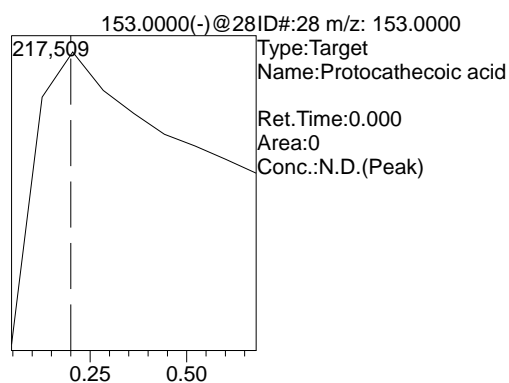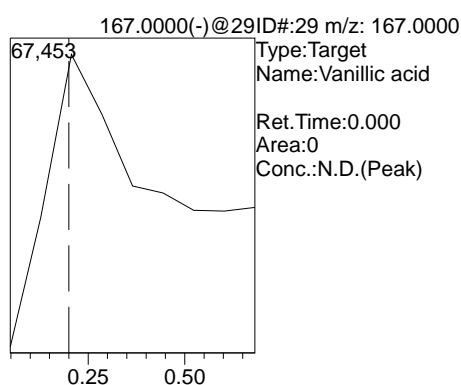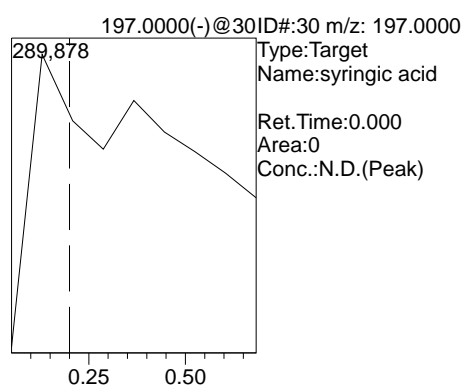



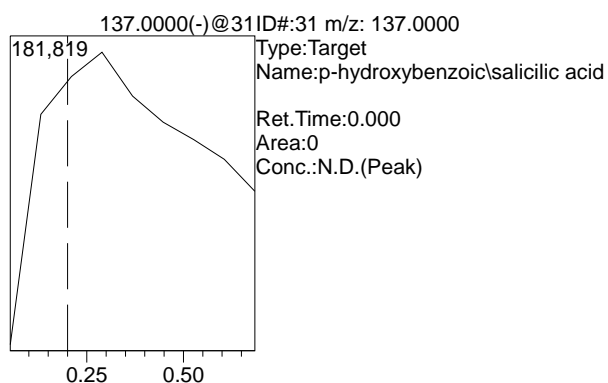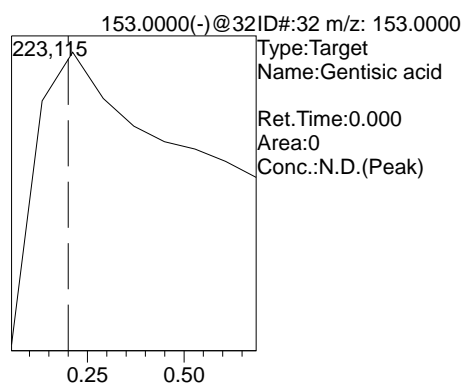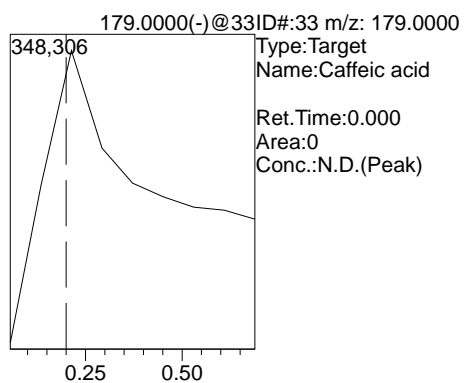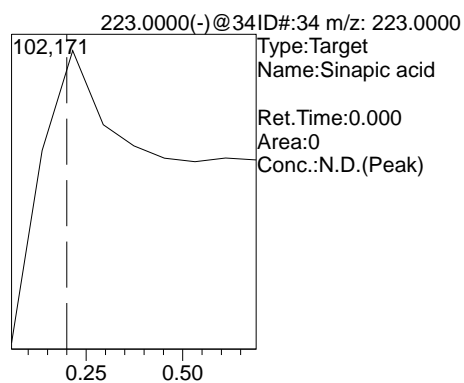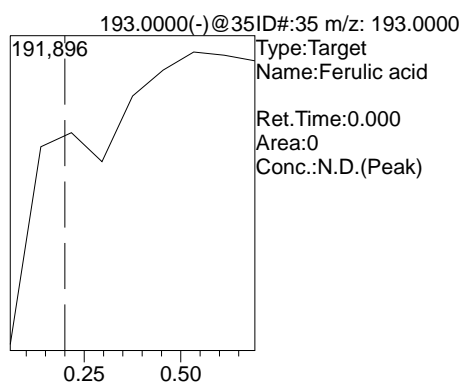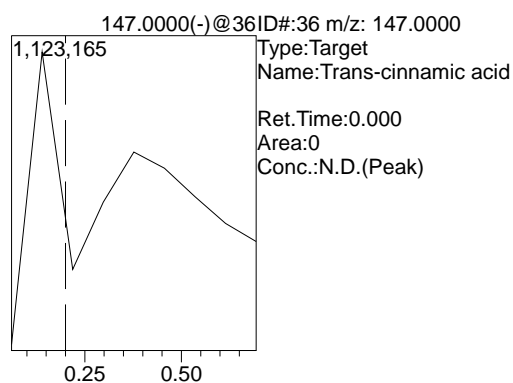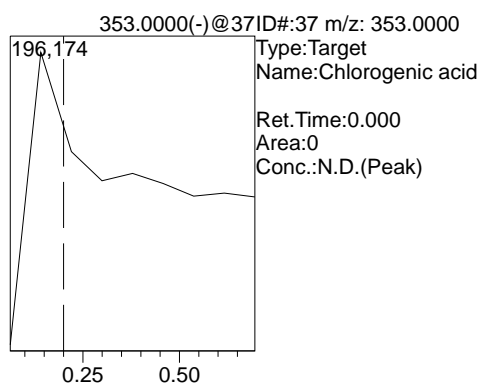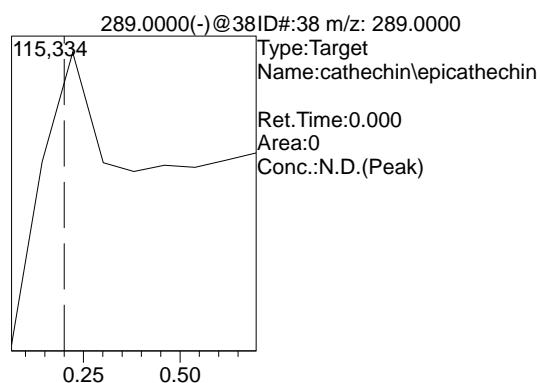

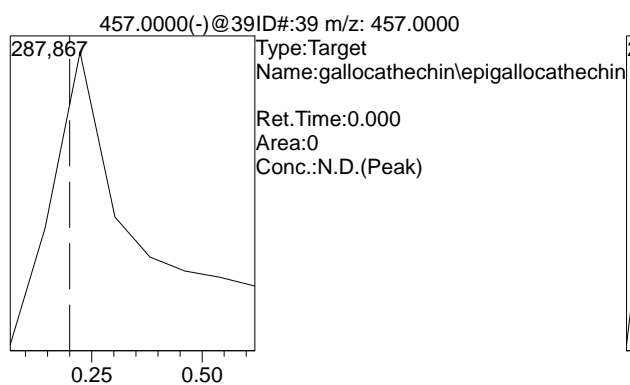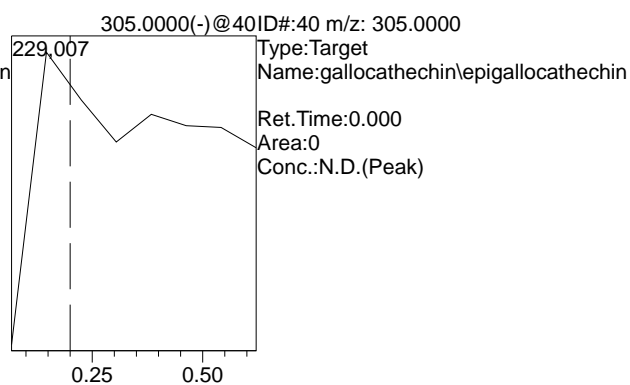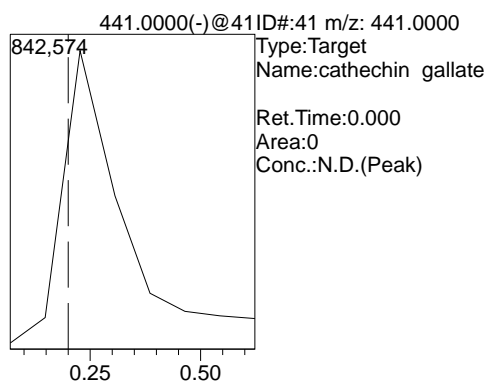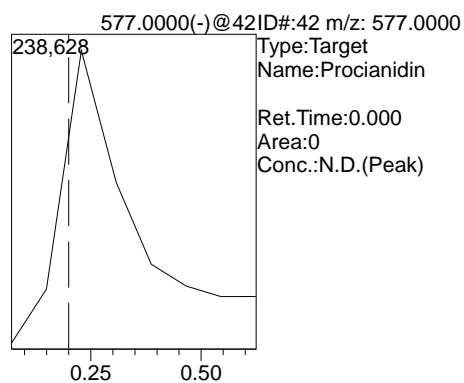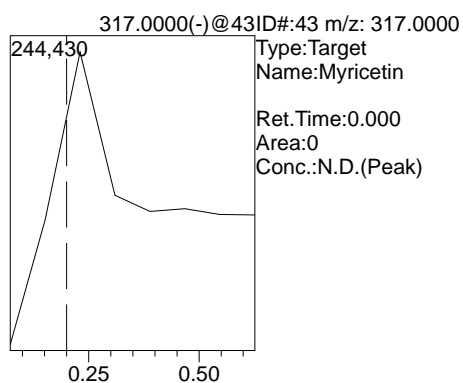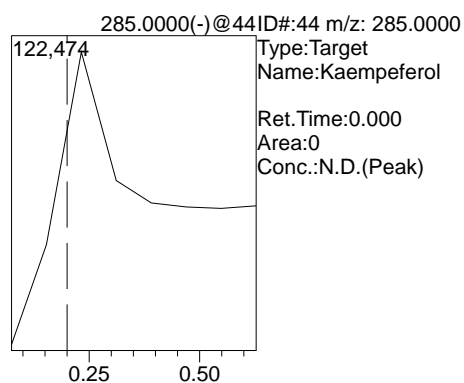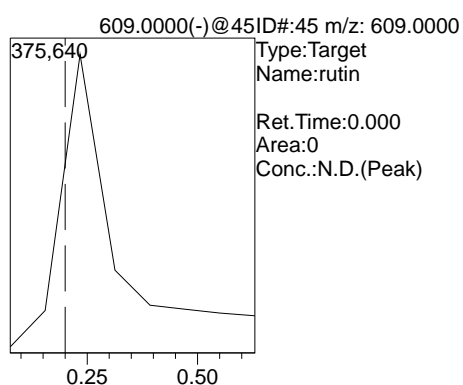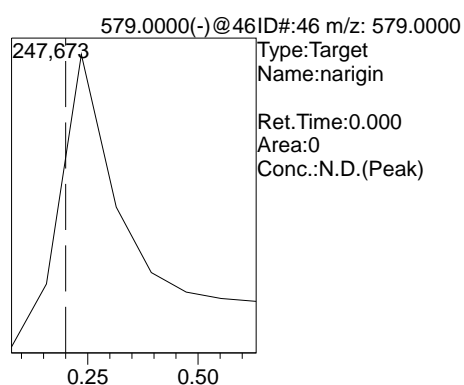

# = Shimadzu LabSolutions Quant. Browser Data Report =

Acquired by : System Administrator  
 Data Acquired : 26/05/2021 11:22:10  
 Sample Type : Unknown  
 Sample Name : lipophylic extract 13  
 Sample ID :  
 Sample Amount : 1  
 Dilution Factor : 1  
 Vial# : 83  
 Injection Volume : 0.5 uL  
 Data Filename : lipophylic extract 13\_006.lcd  
 Method Filename : polifenoli screening SIM.lcm  
 Processed by : System Administrator  
 Modified Date : 26/05/2021 12:36:49

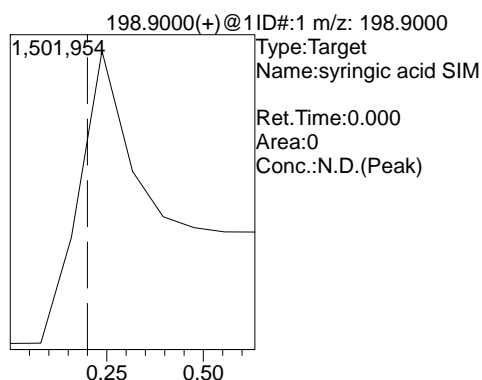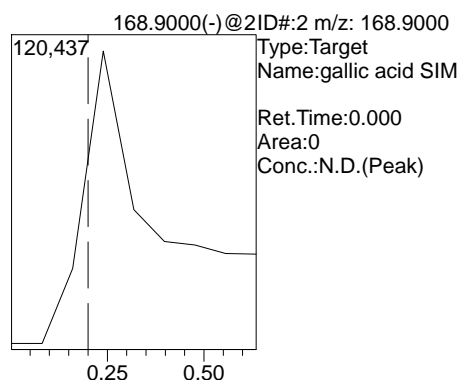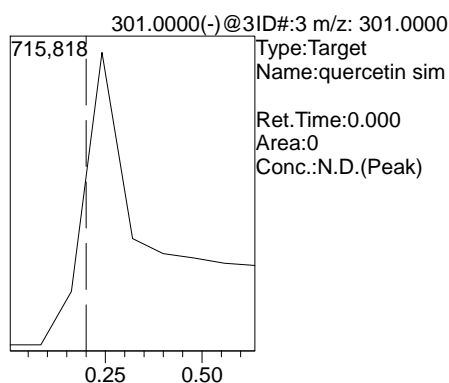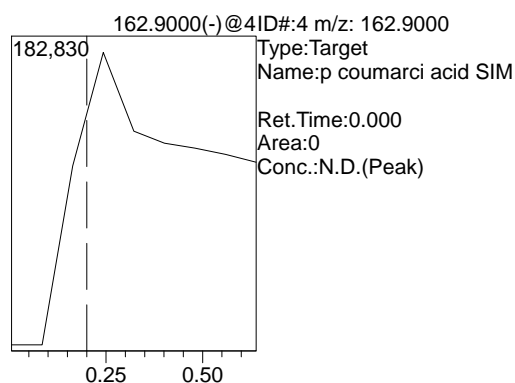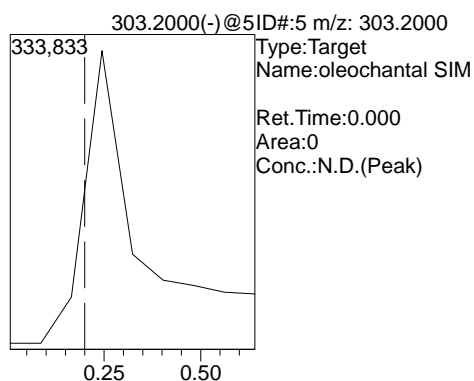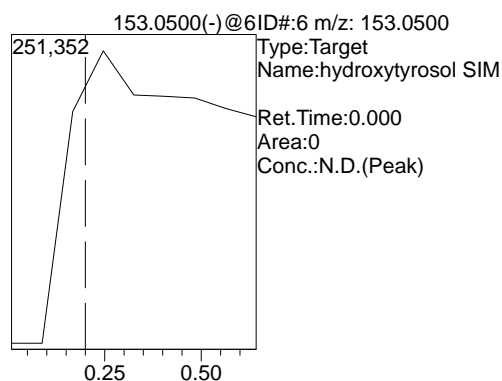

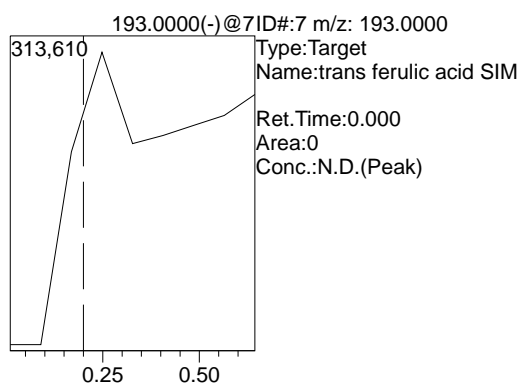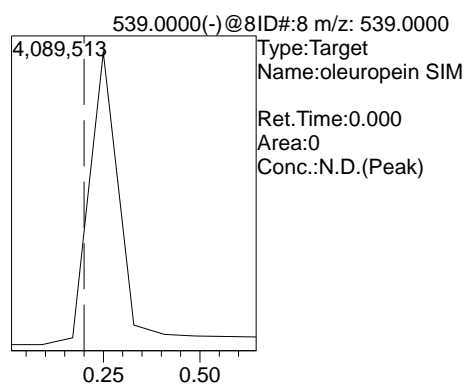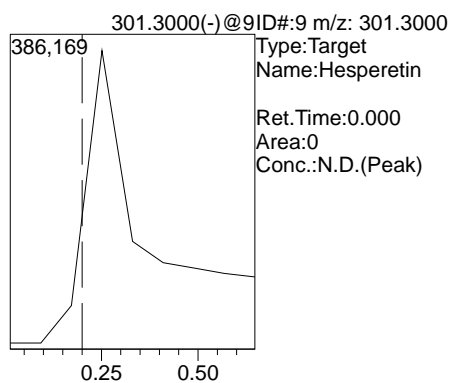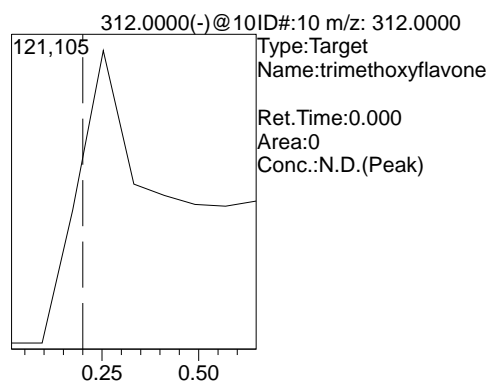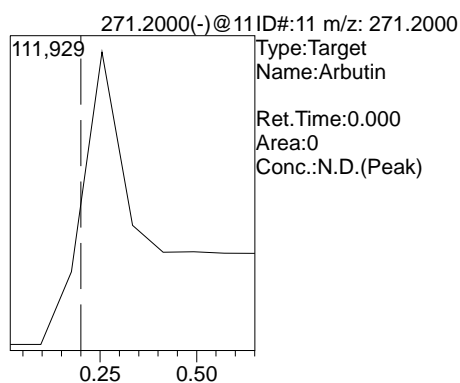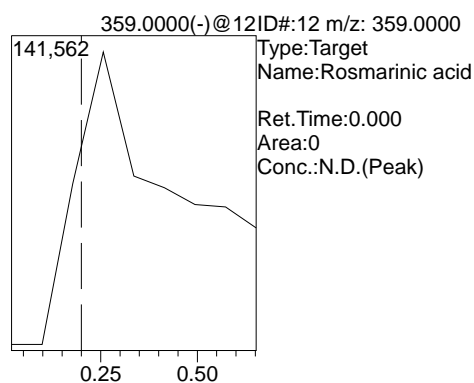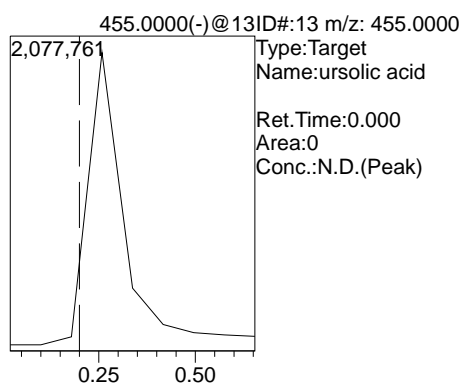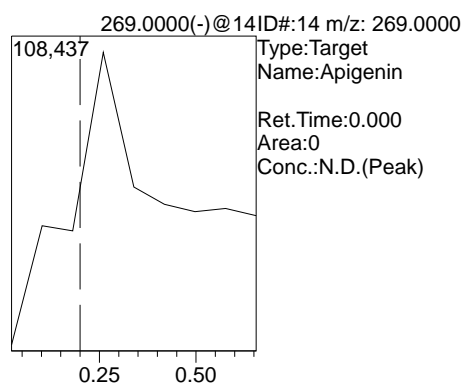

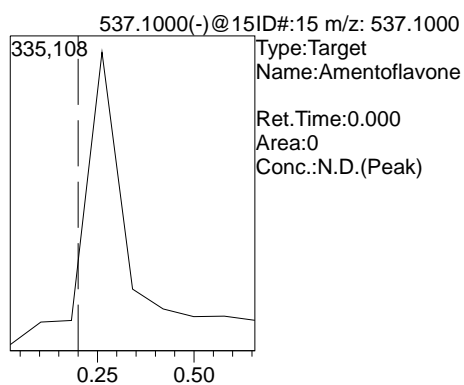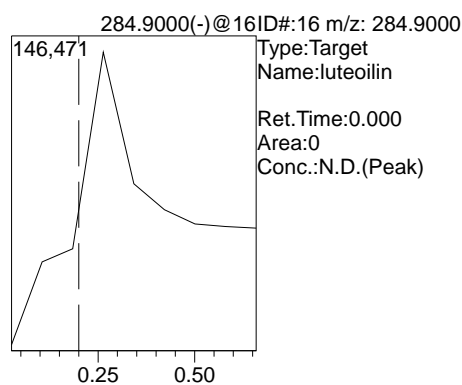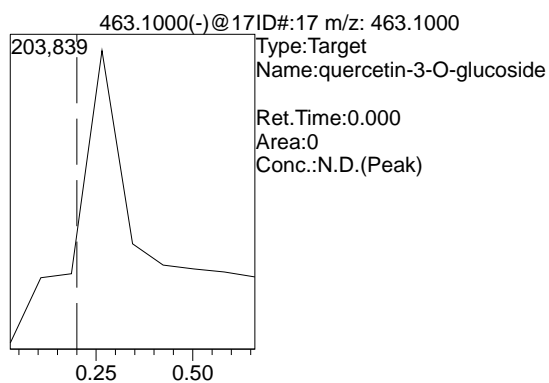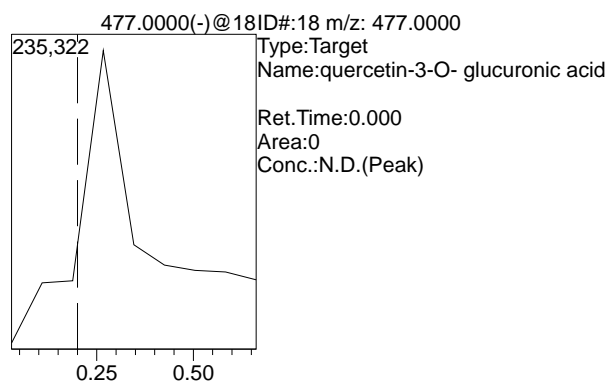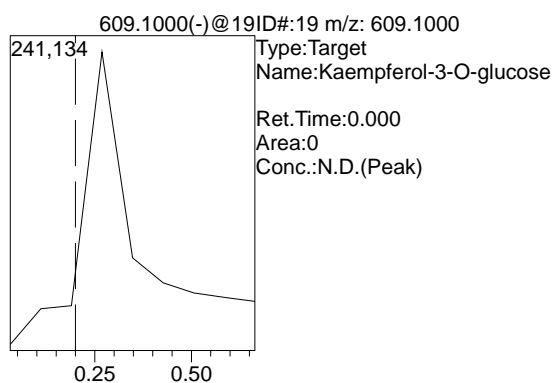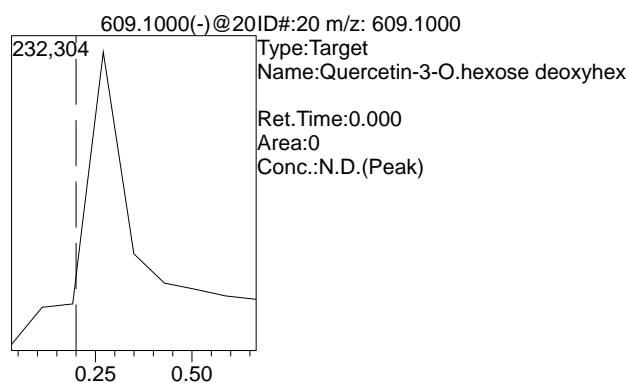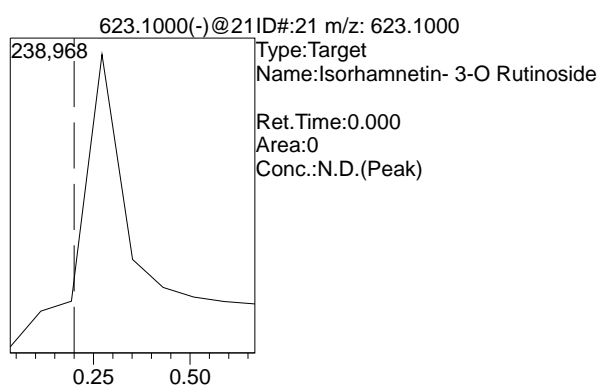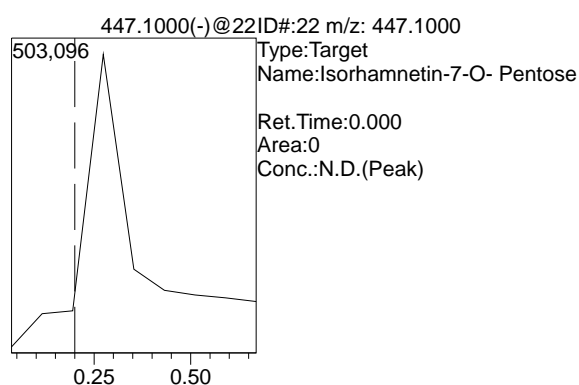

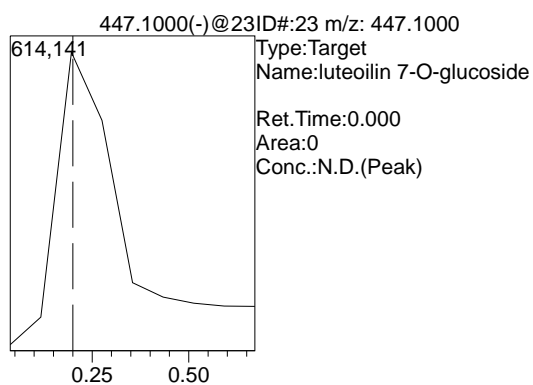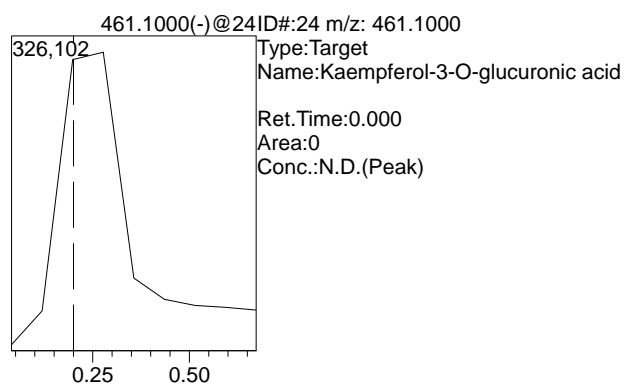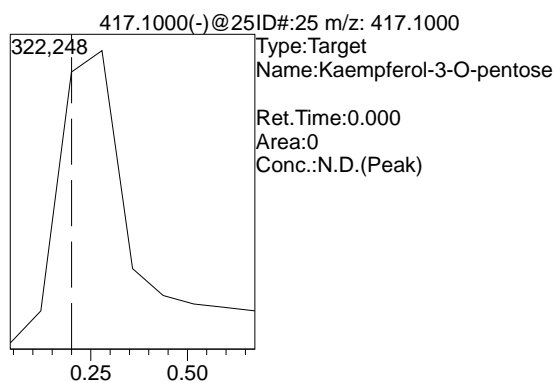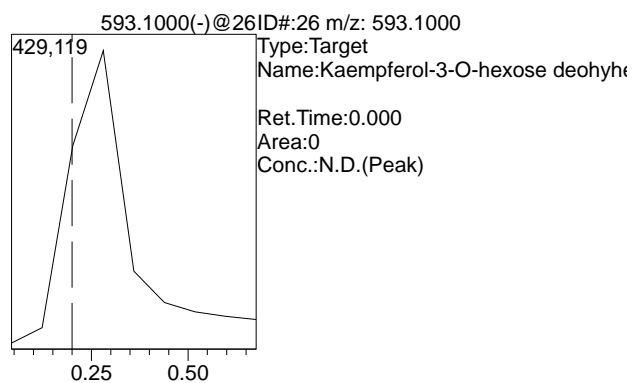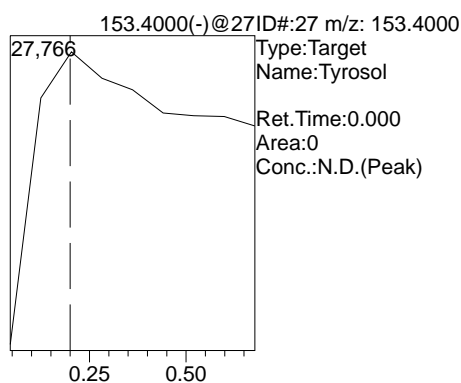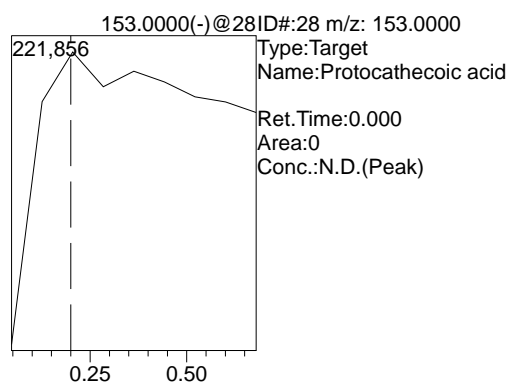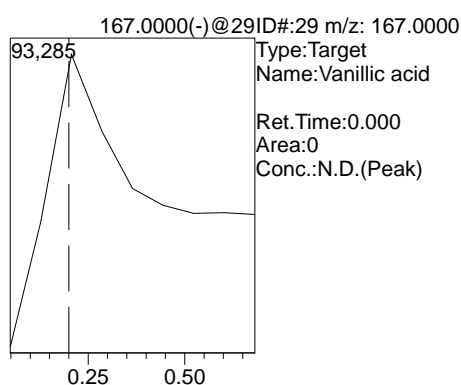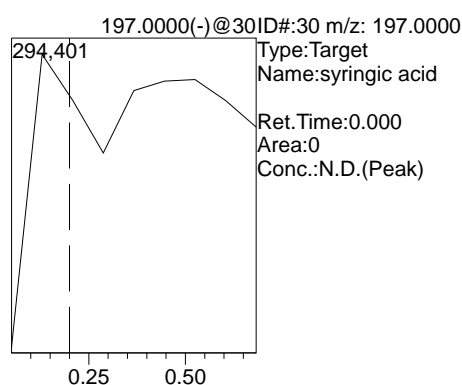

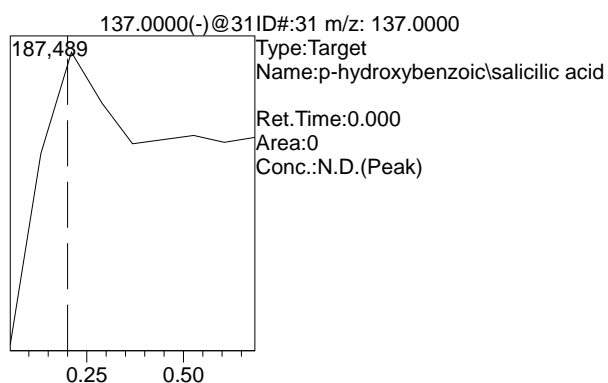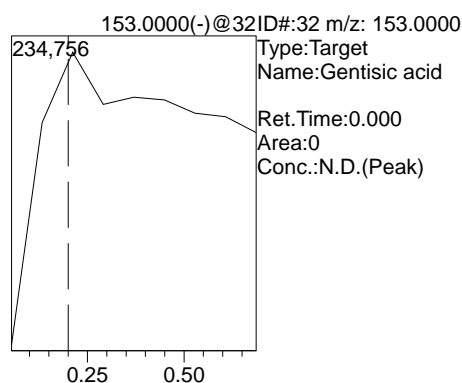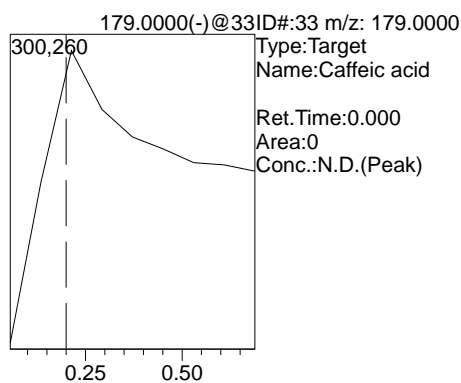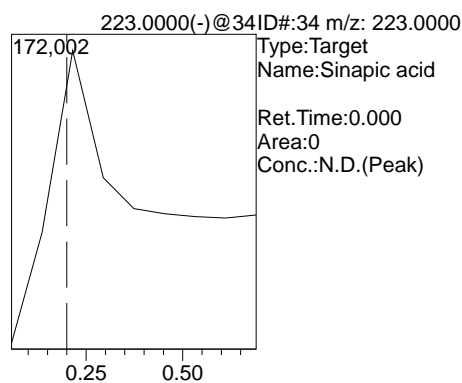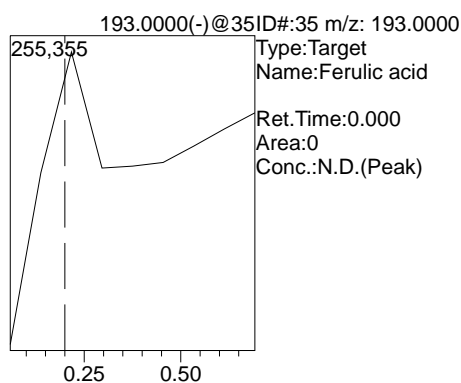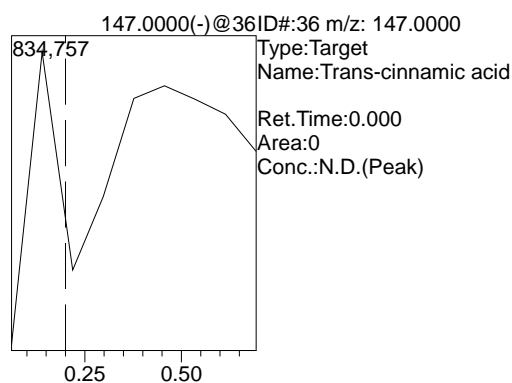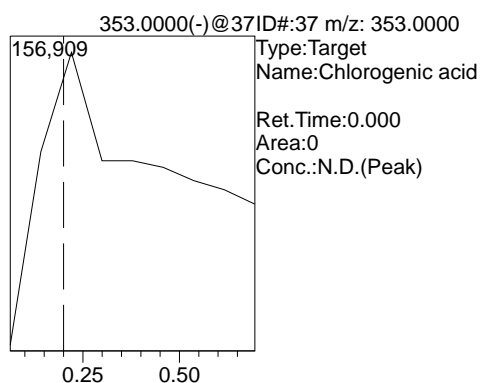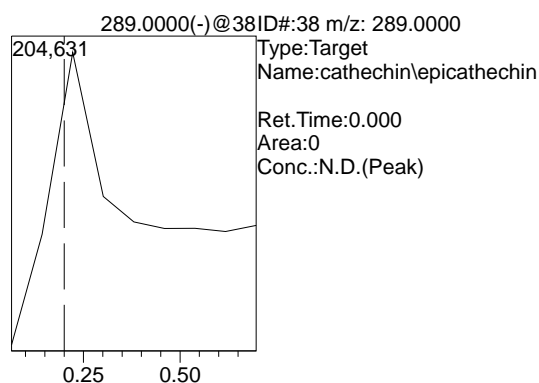

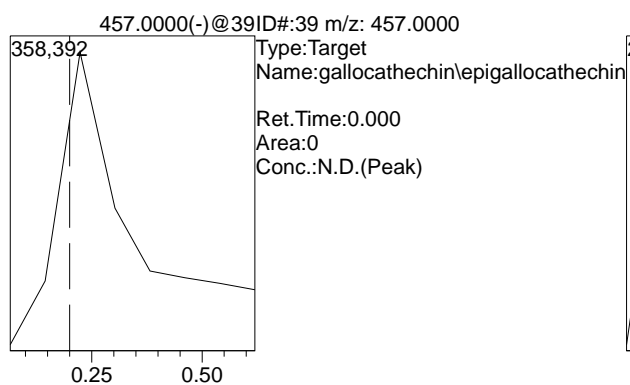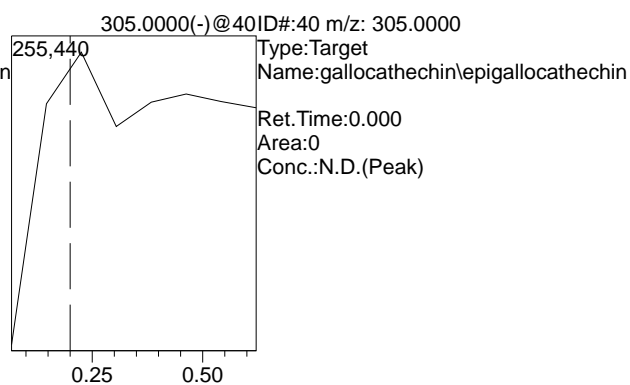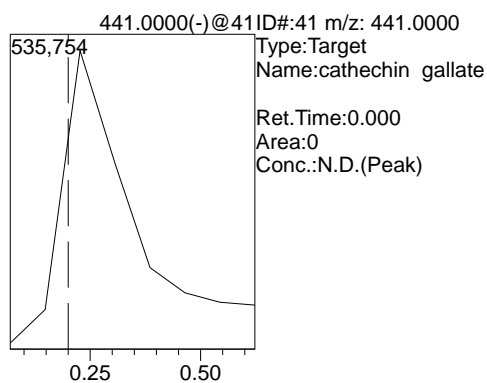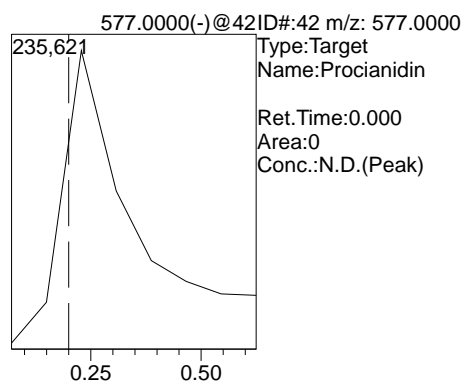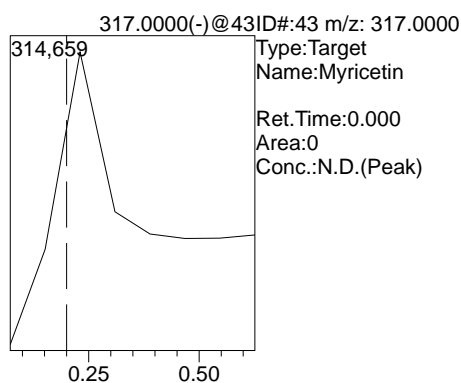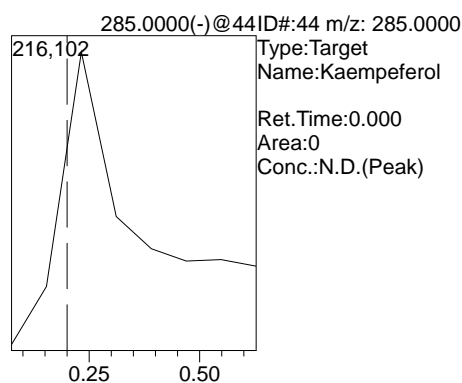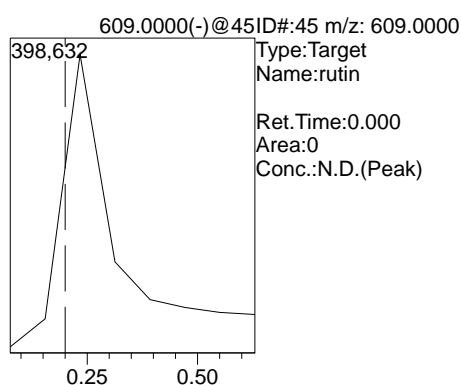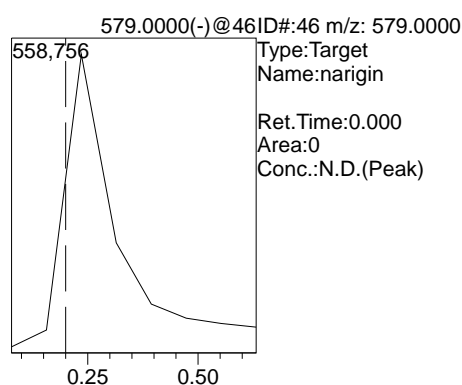

Supplement: s1 [file s1]
